# Supplementary material for: Engineering polypeptide folding through trans double bonds: transformation of miniature β-meanders to hybrid helices
Source: Royal Society of Chemistry journal article supplement (doi:10.1039/c5cc04523a), 2015-01-01

## Engineering polypeptide folding through *trans* double bonds: Transformation of miniature $\beta$ -meanders to hybrid helices

Mothukuri Ganesh Kumar,<sup>a</sup> Sushil N. Benke,<sup>a</sup> K. Muruga Poopathi Raja<sup>\*b</sup> and Hosahudya N. Gopi<sup>\*a</sup>

<sup>a</sup> Department of Chemistry, Indain Institute of Science Education and Research, Dr. Homi Bhabha Road, Pune-411 008, India

<sup>b</sup> Department of Physical Chemistry, School of Chemistry, Madurai Kamaraj University, Madurai-625 021, India

\*Corresponding authors: [hn.gopi@iiserpune.ac.in](mailto:hn.gopi@iiserpune.ac.in); [murugapoopathiraja@gmail.com](mailto:murugapoopathiraja@gmail.com)

### List of Contents

|                                                                                                    |     |
|----------------------------------------------------------------------------------------------------|-----|
| 1. ORTEP diagrams of peptides <b>P1</b> , <b>P3</b> and <b>P4</b> .....                            | S2  |
| 2. Hydrogen bonding parameters for peptides <b>P1</b> , <b>P3</b> and <b>P4</b> .....              | S6  |
| i) Intra-molecular hydrogen bonding parameters                                                     |     |
| ii) Intermolecular hydrogen bonding parameters                                                     |     |
| 3. Torsion angle tables for peptides <b>P1</b> , <b>P3</b> and <b>P4</b> .....                     | S10 |
| 4. Crystallographic information of peptides <b>P1</b> , <b>P3</b> and <b>P4</b> .....              | S11 |
| 5. General experimental details.....                                                               | S13 |
| 6. 2D NMR data of peptides <b>P1</b> and <b>P2</b> .....                                           | S14 |
| i) List of NOE's of peptides                                                                       |     |
| ii) ROESY and TOCSY spectra of peptides                                                            |     |
| iii) Schematic representation of observed NOEs                                                     |     |
| 7. Synthesis and characterization of Boc-d $\gamma$ F-OEt, Boc-d $\gamma$ A-OEt and peptides ..... | S22 |
| 8. CD spectra of peptides.....                                                                     | S26 |
| 9. HPLC traces of peptides.....                                                                    | S29 |
| 10. Variable Temperature <sup>1</sup> H NMR experiments of peptides <b>P1</b> and <b>P2</b> .....  | S31 |
| 11. References.....                                                                                | S34 |
| 12. <sup>1</sup> H NMR and MALDI-TOF/TOF spectra of peptides.....                                  | S35 |

## 1. ORTEP diagrams of peptides

### Peptide P1:

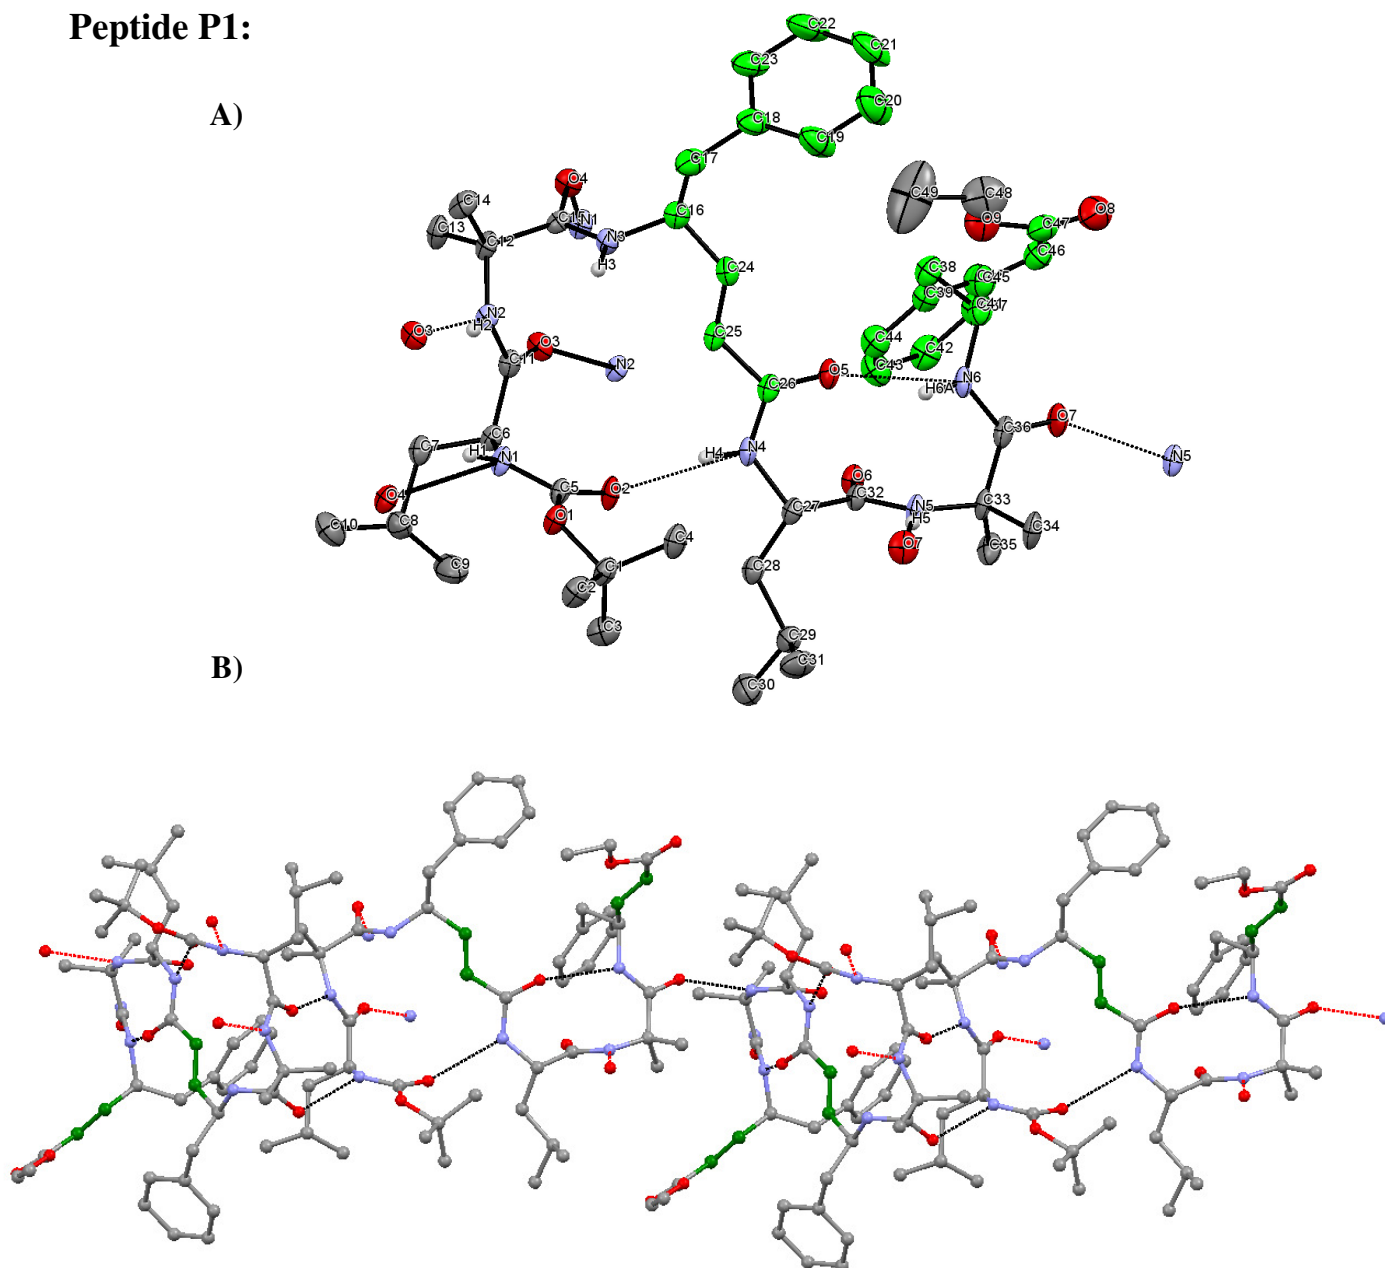

**Figure S1:** A) ORTEP diagram of hybrid peptide Boc-(LUd $\gamma$ F)<sub>2</sub>-OEt (**P1**) containing  $\alpha$ ,  $\beta$ -unsaturated  $\gamma$ -phenylalanine residues (represented by green color atoms) where ellipsoids are drawn to 70% probability. Hydrogen bonds are represented in dotted lines. Only polar H-atoms were shown for clarity. (CCDC number 1063358). B) View of Crystal packing for **P1** along b-axis.

## Peptide P3:

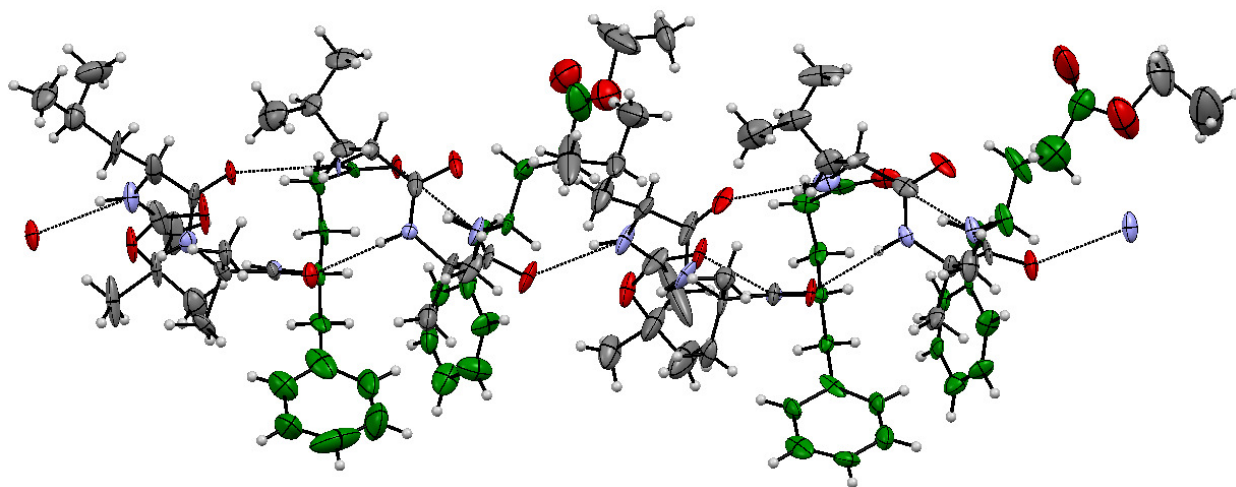

**Figure S2:** ORTEP diagram of hybrid peptide Boc-(LU $\gamma$ F)<sub>2</sub>-OEt(**P3**) containing  $\gamma^4$ -phenylalanine residues (represented by green color atoms) where ellipsoids are drawn to 70% probability. Two molecules of **P3** present in an asymmetric unit. Hydrogen bonds are represented in dotted lines. Only polar H-atoms were shown for clarity. (CCDC number 1060827).



## Peptide P4:

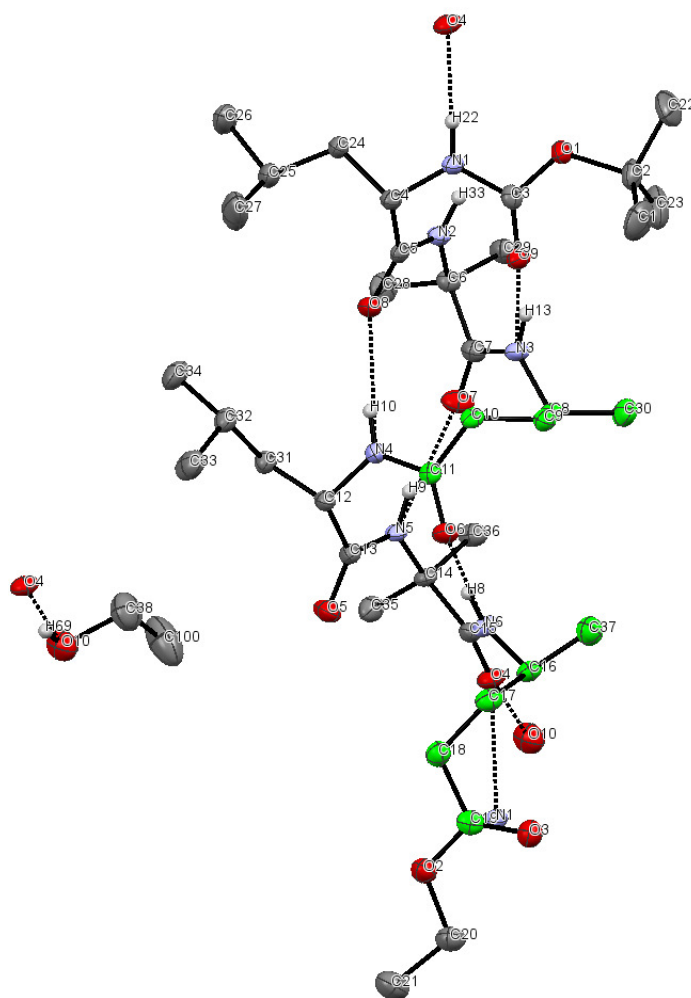

**Figure S4:** ORTEP diagram of peptide Boc-(LU $\gamma$ A)<sub>2</sub>-OEt(**P4**) containing  $\gamma^4$ -alanine residues (represented by green color atoms) where ellipsoids are drawn to 69% probability. One ethanol solvent molecule present in the asymmetric unit. Hydrogen bonds are represented in dotted lines. Only polar H-atoms are shown for clarity. (CCDC number 1060826).

## 2. H-bond Parameters

**Table S1: Peptide P1 [Boc-LU $\gamma$ FLU $\gamma$ F-OEt]**

### i) Intramolecular H-bond parameters

| Donor<br>(D) | Acceptor<br>(A) | D...A<br>(Å) | DH...A<br>(Å) | $\angle$ NH...O<br>(deg) |
|--------------|-----------------|--------------|---------------|--------------------------|
| N4           | O2              | 2.944        | 2.235         | 139.70                   |
| N6           | O5              | 2.853        | 2.055         | 153.98                   |

### ii) Intermolecular H-bond parameters

| Donor<br>(D) | Acceptor<br>(A) | D...A<br>(Å) | DH...A<br>(Å) | $\angle$ NH...O<br>(deg) |
|--------------|-----------------|--------------|---------------|--------------------------|
| N1           | O4 <sup>§</sup> | 2.931        | 2.160         | 148.05                   |
| N2           | O3 <sup>§</sup> | 3.063        | 2.238         | 160.90                   |
| N5           | O7 <sup>†</sup> | 2.934        | 2.075         | 176.72                   |
| O3           | N2 <sup>‡</sup> | 3.063        | 2.238         | 160.90                   |
| O4           | N1 <sup>‡</sup> | 2.931        | 2.160         | 148.05                   |
| O7           | N5 <sup>*</sup> | 2.934        | 2.075         | 176.72                   |

Symmetry transformations used to generate equivalent atoms:

§ 1.5-x, 1/2+y, 2-z; † 1.5-x, 1/2+y, 1-z; ‡ 1.5-x, 1/2+y, 2-z; \* 1.5-x, 1/2+y, 1-z

**Table S2: Peptide P3[Boc-LU $\gamma$ FLU $\gamma$ F-OEt]**

i) **Intramolecular H-bond parameters for two molecules A and B in the asymmetric unit**

| Acceptor<br>(A) | Donor<br>(D) | D....A<br>(Å) | DH....A<br>(Å) | $\angle$ NH....O<br>(deg) |
|-----------------|--------------|---------------|----------------|---------------------------|
| O2 (A)          | N19 (A)      | 3.08          | 2.35           | 142.8                     |
| O3 (A)          | N16 (A)      | 2.95          | 2.12           | 163.5                     |
| O4 (A)          | N18 (A)      | 2.99          | 2.14           | 169.5                     |
| O5 (A)          | N17 (A)      | 2.84          | 2.04           | 153                       |
| O11 (B)         | N26 (B)      | 2.99          | 2.25           | 143.9                     |
| O12 (B)         | N23 (B)      | 2.92          | 2.07           | 164.8                     |
| O13 (B)         | N24(B)       | 3.04          | 2.20           | 165                       |
| O14 (B)         | N25 (B)      | 2.84          | 2.03           | 157.4                     |

ii) Intermolecular H-bond parameters for two molecules A and B in the asymmetric unit

| Donor<br>(D)         | Acceptor<br>(A)  | D....A<br>(Å) | DH....A<br>(Å) | ∠NH....O<br>(deg) |
|----------------------|------------------|---------------|----------------|-------------------|
| <b>Molecule A</b>    |                  |               |                |                   |
| N14                  | O16 <sup>*</sup> | 2.90          | 2.153          | 161               |
| N15                  | O19 <sup>*</sup> | 3.00          | 2.068          | 169               |
| O00B                 | O21 <sup>#</sup> | 2.70          | -              | -                 |
| O8 <sup>†</sup>      | O21 <sup>#</sup> | 2.97          | -              | -                 |
| O7                   | O20              | 2.84          | -              | -                 |
| O7                   | N20 (B)          | 2.87          | 2.04           | 161               |
| <b>Molecule B</b>    |                  |               |                |                   |
| N20                  | O7 (A)           | 2.87          | 2.04           | 161               |
| N21                  | O20              | 2.99          | 2.14           | 167               |
| O16                  | O19              | 2.84          | -              | -                 |
| N14 (A) <sup>‡</sup> | O16              | 2.90          | 2.07           | 161               |

Symmetry transformations used to generate equivalent atoms:

<sup>\*</sup> x, y, -1+z; <sup>#</sup> -1+x, y, z; <sup>†</sup> 1+x, y, z; <sup>‡</sup> x, y, 1+z



**Table S3: Peptide P4 [Boc-LU $\gamma$ ALU $\gamma$ A-OEt]****i) Intramolecular Hydrogen bond parameters**

| Acceptor<br>(A) | Donor<br>(D) | D....A<br>(Å) | DH....A<br>(Å) | $\angle$ NH....O<br>(deg) |
|-----------------|--------------|---------------|----------------|---------------------------|
| O9              | N3           | 2.92          | 2.162          | 146.95                    |
| O8              | N4           | 2.94          | 2.0841         | 171.6                     |
| O7              | N5           | 2.93          | 2.102          | 160.68                    |
| O6              | N6           | 3.00          | 2.209          | 153.93                    |

**ii) Intermolecular Hydrogen bond parameters**

| Acceptor<br>(A) | Donor<br>(D)     | D....A<br>(Å) | DH....A<br>(Å) | $\angle$ NH....O<br>(deg) |
|-----------------|------------------|---------------|----------------|---------------------------|
| N1              | O4 <sup>*</sup>  | 2.80          | 1.95           | 168                       |
| O4              | N1 <sup>†</sup>  | 2.80          | 1.95           | 168                       |
| O4 <sup>‡</sup> | O10 <sup>#</sup> | 2.88          | 2.14           | 165                       |

Symmetry transformations used to generate equivalent atoms:

<sup>\*</sup> 1+x, 1+y, 1+z; <sup>†</sup> -1+x, -1+y, -1+z; <sup>#</sup> x, -1+y, z; <sup>‡</sup> x, 1+y, z

### 3. Torsion angles of hybrid peptides

**Table S4:** Torsion angles of peptides **P1**, **P4** and **P6**.

| Pept.     | Resd.         | $\phi$       | $\theta_1$  | $\theta_2$ | $\psi$      | $\omega$     |
|-----------|---------------|--------------|-------------|------------|-------------|--------------|
| <b>P1</b> | Leu1          | -95          | -           | -          | -46         | -163         |
|           | Aib2          | -60          | -           | -          | -45         | -174         |
|           | d $\gamma$ F3 | -129         | 18          | -178       | 178         | -178         |
|           | Leu4          | -48          | -           | -          | 128         | 177          |
|           | Aib5          | 68           | -           | -          | 11          | 173          |
|           | d $\gamma$ F6 | -122         | 118         | -178       | -10         | -            |
| <b>P4</b> | Leu1          | -53          | -           | -          | -40 $\pm$ 2 | -175 $\pm$ 2 |
|           | Aib2          | -57          | -           | -          | -34         | -174         |
|           | $\gamma$ F3   | -127 $\pm$ 1 | 52          | 61         | -114        | -175 $\pm$ 1 |
|           | Leu4          | -55 $\pm$ 2  | -           | -          | -39         | 178          |
|           | Aib5          | -59          | -           | -          | -25         | -173 $\pm$ 1 |
|           | $\gamma$ F6   | -104         | 172 $\pm$ 4 | 176/-161   | 98 $\pm$ 15 | -            |
| <b>P6</b> | Leu1          | -46          | -           | -          | -41         | -177         |
|           | Aib2          | -54          | -           | -          | -37         | -173         |
|           | $\gamma$ A3   | -132         | 55          | 59         | -122        | -169         |
|           | Leu4          | -62          | -           | -          | -37         | -178         |
|           | Aib5          | -67          | -           | -          | -12         | -177         |
|           | $\gamma$ A6   | -121         | 74          | 82         | 172         | -            |

#### 4. Crystallographic Information

**Crystal structure analysis of Boc-L-U-d $\gamma$ F-L-U-d $\gamma$ F-OEt (P1):** Crystals of peptide were grown by slow evaporation from a solution of methanol/toluene (1:1). A single crystal (0.21  $\times$  0.08  $\times$  0.1 mm) was mounted on loop with a small amount of the paraffin oil. The X-ray data were collected at 100K temperature on a Bruker APEX(II) DUO CCD diffractometer using Mo K $\alpha$  radiation ( $\lambda = 0.71073 \text{ \AA}$ ),  $\omega$ -scans ( $2\theta = 52.52$ ), for a total of 14074 independent reflections. Space group C2,  $a = 35.352(11)$ ,  $b = 10.430(3)$ ,  $c = 17.876(5)$ ,  $\beta = 107.549(5)$ ,  $V = 6285(3) \text{ \AA}^3$ , Monoclinic C,  $Z = 4$  for chemical formula C<sub>49</sub>H<sub>72</sub>N<sub>6</sub>O<sub>9</sub> (C<sub>7</sub>H<sub>8</sub>), with one molecule in asymmetric unit;  $\rho_{\text{calcd}} = 1.037 \text{ gcm}^{-3}$ ,  $\mu = 0.070 \text{ mm}^{-1}$ ,  $F(000) = 2120$ ,  $R_{\text{int}} = 0.0506$ . The structure was obtained by direct methods using SHELXS-97.<sup>1</sup> The final R value was 0.0542 ( $wR2 = 0.1280$ ) 14074 observed reflections ( $F_o \geq 4\sigma(|F_o|)$ ) and 589 variables,  $S = 0.832$ . The largest difference peak and hole were 0.228 and  $-0.256 \text{ e\AA}^3$ , respectively.

There is some partially occupied solvent molecule also present in the asymmetric unit. A significant amount of time was invested in identifying and refining the disordered molecule. Option SQUEEZE of program PLATON<sup>2</sup> was used to correct the diffraction data for diffuse scattering effects and to identify the solvent molecule. PLATON calculated the upper limit of volume that can be occupied by the solvent to be  $1740 \text{ \AA}^3$ , or 27.7% of the unit cell volume. The program calculated 118 electrons in the unit cell for the diffuse species. No data are given for the diffusely scattering species. Outputs of SQUEEZE report are appended in cif file **P1**.

**Crystal structure analysis of Boc-L-U- $\gamma$ F-L-U- $\gamma$ F-OEt (P3):** Crystals of peptide were grown by slow evaporation from a solution of methanol. A single crystal (0.12  $\times$  0.09  $\times$  0.1 mm) was mounted on loop with a small amount of the paraffin oil. The X-ray data were collected at 100K temperature on a Bruker APEX(II) DUO CCD diffractometer using Mo K $\alpha$  radiation ( $\lambda = 0.71073 \text{ \AA}$ ),  $\omega$ -scans ( $2\theta = 56.7$ ), for a total of 90866 independent reflections. Space group P 21,  $a = 9.286(3)$ ,  $b = 20.892(7)$ ,  $c = 27.661(9)$ ,  $\beta = 98.639(6)$ ,  $V = 5305(3) \text{ \AA}^3$ , Monoclinic C,  $Z = 2$  for chemical formula C<sub>49</sub> H<sub>76</sub> N<sub>6</sub> O<sub>9</sub>(CH<sub>4</sub> O, 3 O), with two molecule in asymmetric unit;  $\rho_{\text{calcd}} = 1.168 \text{ gcm}^{-3}$ ,  $\mu = 0.082 \text{ mm}^{-1}$ ,  $F(000) = 1936$ ,  $R_{\text{int}} = 0.1470$ . The structure was obtained

by direct methods using SHELXS-97.<sup>1</sup> The final R value was 0.1509 (wR2 = 0.3727) 26002 observed reflections ( $F_0 \geq 4\sigma(I_{F_0})$ ) and 1224 variables, S = 1.642.

There are partially occupied solvent molecules along with peptide molecules. Option SQUEEZE of program PLATON<sup>2</sup> was used to correct the diffraction data for diffuse scattering effects and to identify the solvent molecule. PLATON calculated the upper limit of volume that can be occupied by the solvent to be 470 Å<sup>3</sup>, or 8.8% of the unit cell volume. Outputs of SQUEEZE report are appended in CIF file **P4**. This structure contains ethyl ester groups. Even though this structure was collected at 100K the thermal parameters for one of the ethyl ester group was very high. This was attempted to be modeled as disorder but this was not successful. The conclusion is that this group is not well defined and thus was refined isotropically.

**Crystal structure analysis of Boc-L-U- $\gamma$ A-L-U- $\gamma$ A-OEt (P4):** Crystals of peptide were grown by slow evaporation from a solution of ethanol. A single crystal (0.15 × 0.04 × 0.07 mm) was mounted on loop with a small amount of the paraffin oil. The X-ray data were collected at 100K temperature on a Bruker APEX(II) DUO CCD diffractometer using Mo K $\alpha$  radiation ( $\lambda = 0.71073$  Å),  $\omega$ -scans ( $2\theta = 56.9$ ), for a total of 7174 independent reflections. Space group P1, a = 9.7972 (4), b = 10.4809 (5), c = 12.3285 (6),  $\beta = 102.4740$  (10), V = 1132 (9) Å<sup>3</sup>, Triclinic, Z = 1 for chemical formula C<sub>37</sub> H<sub>68</sub> N<sub>6</sub> O<sub>9</sub> (C<sub>2</sub> H<sub>6</sub> O), with one molecule in asymmetric unit;  $\rho_{\text{calcd}} = 1.129$  gcm<sup>-3</sup>,  $\mu = 0.081$  mm<sup>-1</sup>, F (000) = 419, R<sub>int</sub> = 0.0401. The structure was obtained by direct methods using SHELXS-97.<sup>1</sup> The final R value was 0.035 (wR2 = 0.1052) 7363 observed reflections ( $F_0 \geq 4\sigma(I_{F_0})$ ) and 514 variables, S = 0.908.

## 5. General experimental details

All amino acids, triphenylphosphine, TFA, Ethyl bromoacetate, DCC, HOBt and LAH were commercially available. DCM, DMF, ethyl acetate and petether(60-80 °C) have used after distillation. THF was dried over sodium and distilled immediately prior to use. Column chromatography was performed on silica gel (120-200 mesh). Final peptides were purified on reverse phase HPLC (C18 column, MeOH/H<sub>2</sub>O 60:40-95:5 as gradient with flow rate 1.00 mL/min). <sup>1</sup>H spectra were recorded on 500 MHz (or <sup>13</sup>C on 125 MHz) and 400 MHz (or <sup>13</sup>C on 100 MHz) using residual solvents as internal standards (CDCl<sub>3</sub>  $\delta_H$  7.26 ppm,  $\delta_C$  77.3 ppm). Chemical shifts ( $\delta$ ) reported in ppm and coupling constants ( $J$ ) reported in Hz.

**NMR spectroscopy:** All NMR studies were carried out by using a Bruker AVANCE<sup>III</sup>-500 MHz spectrometer. Resonance assignments were obtained by TOCSY and ROESY analysis. All two-dimensional data were collected in phase-sensitive mode, by using the time-proportional phase incrementation (TPPI) method. Sets of 1024 and 512 data points were used in the  $t_2$  and  $t_1$  dimensions, respectively. For TOCSY and ROESY analysis, 32 and 72 transients were collected, respectively. A spectral width of 6007 Hz was used in both dimensions. A spin-lock time of 256 ms was used to obtain ROESY spectra. Zero-filling was carried out to finally yield a data set of 2 K  $\times$  1 K. A shifted square-sine-bell window was used before processing.

**Circular dichroism (CD) spectroscopy:** CD analysis was performed using cylindrical, jacketed quartz cell (1 mm path length). Spectra were recorded with a spectral resolution of 0.05 nm, band width 1 nm at a scan speed of 50nm/min and a response time 1 sec. All the spectra were corrected for water solvent and are typically averaged over 3 scans.

## 6. 2D NMR data of Peptides P1 and P2

**Table S5:** List of NOE's observed in ROESY spectrum of **P1**

| Residue          | H-atom      | Residue          | H-atom                          | NOE observed |
|------------------|-------------|------------------|---------------------------------|--------------|
| Leu (1)          | $\alpha$ CH | Aib (2)          | NH                              | Strong       |
| Leu (1)          | NH          | Aib (2)          | NH                              | Strong       |
| Leu (1)          | NH          | Leu (1)          | $\alpha$ CH                     | Medium       |
| Leu (1)          | NH          | Leu (1)          | $\beta$ CH                      | Strong       |
| Leu (1)          | NH          | Leu (1)          | $\gamma$ CH                     | Strong       |
| Leu (1)          | NH          | Leu (1)          | $\delta$ CH                     | Strong       |
| Leu (1)          | $\alpha$ CH | Aib (2)          | (CH <sub>3</sub> ) <sub>2</sub> | Strong       |
| Aib (2)          | NH          | d $\gamma$ F (3) | NH                              | Strong       |
| Aib (2)          | NH          | Aib (2)          | (CH <sub>3</sub> ) <sub>2</sub> | Strong       |
| d $\gamma$ F (3) | NH          | Aib (2)          | (CH <sub>3</sub> ) <sub>2</sub> | Medium       |
| d $\gamma$ F (3) | $\alpha$ CH | Leu (4)          | NH                              | Strong       |
| d $\gamma$ F (3) | NH          | d $\gamma$ F (3) | $\omega$ CH <sub>2</sub>        | Strong       |
| d $\gamma$ F (3) | $\beta$ CH  | d $\gamma$ F (3) | $\omega$ CH <sub>2</sub>        | Strong       |
| d $\gamma$ F (3) | $\gamma$ CH | d $\gamma$ F (3) | Aromatic                        | Strong       |
| d $\gamma$ F (3) | $\alpha$ CH | d $\gamma$ F (3) | $\gamma$ CH                     | Weak         |
| Leu (4)          | NH          | Leu (4)          | $\beta$ CH                      | Medium       |
| Leu (4)          | NH          | Leu (4)          | $\gamma$ CH                     | Weak         |
| Aib (5)          | NH          | Leu (4)          | $\beta$ CH                      | Weak         |
| Aib (5)          | NH          | Leu (4)          | $\alpha$ CH                     | Strong       |
| Aib (5)          | NH          | d $\gamma$ F (6) | NH                              | Strong       |
| Aib (5)          | NH          | Aib (5)          | (CH <sub>3</sub> ) <sub>2</sub> | Strong       |
| d $\gamma$ F (6) | NH          | Aib (5)          | (CH <sub>3</sub> ) <sub>2</sub> | Medium       |
| d $\gamma$ F (6) | NH          | d $\gamma$ F (6) | $\omega$ CH <sub>2</sub>        | Strong       |
| d $\gamma$ F (6) | NH          | d $\gamma$ F (6) | $\alpha$ CH                     | Strong       |
| d $\gamma$ F (6) | $\alpha$ CH | d $\gamma$ F (6) | $\omega$ CH <sub>2</sub>        | Weak         |
| d $\gamma$ F (6) | $\alpha$ CH | d $\gamma$ F (6) | $\gamma$ CH                     | Weak         |
| d $\gamma$ F (6) | $\alpha$ CH | Aib (5)          | (CH <sub>3</sub> ) <sub>2</sub> | Weak         |
| d $\gamma$ F (6) | $\beta$ CH  | d $\gamma$ F (6) | $\omega$ CH <sub>2</sub>        | Strong       |

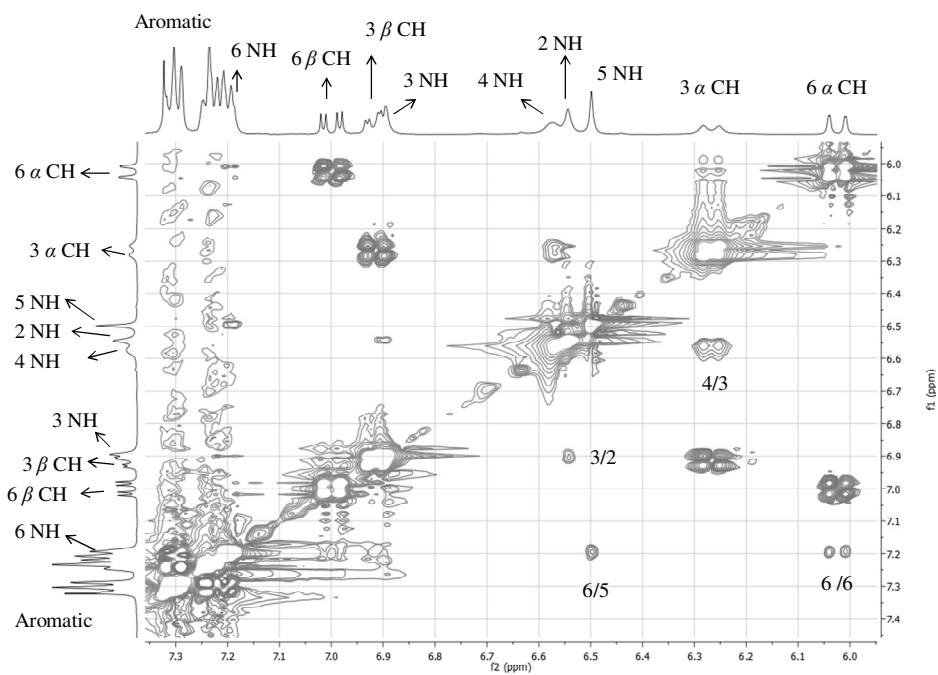

**Figure S5:** Partial ROESY spectrum of Peptide **P1**.

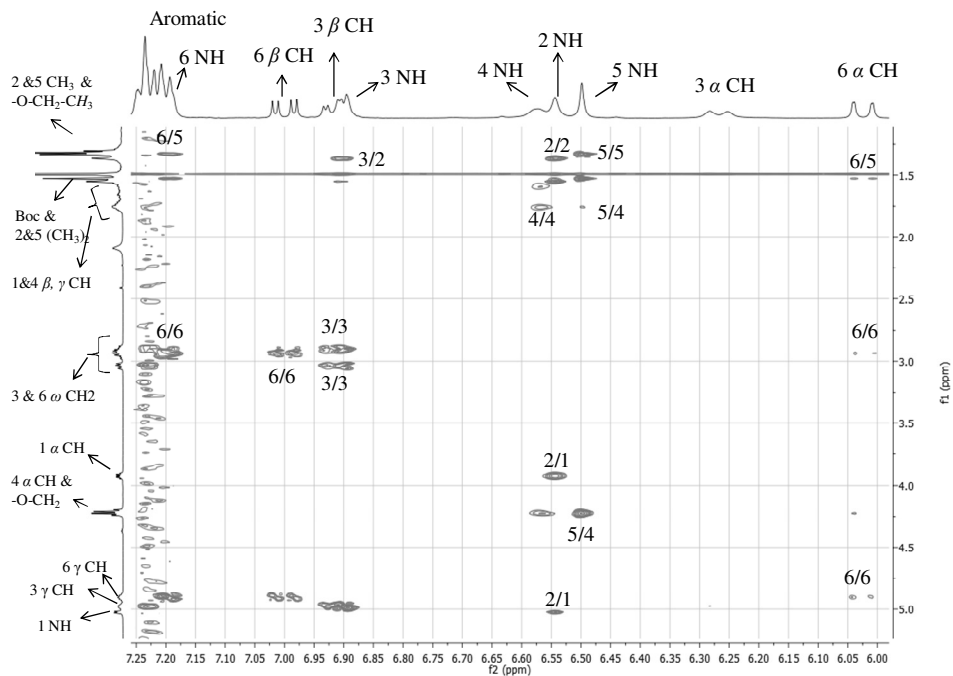

**Figure S6:** Partial ROESY spectrum of Peptide **P1**.

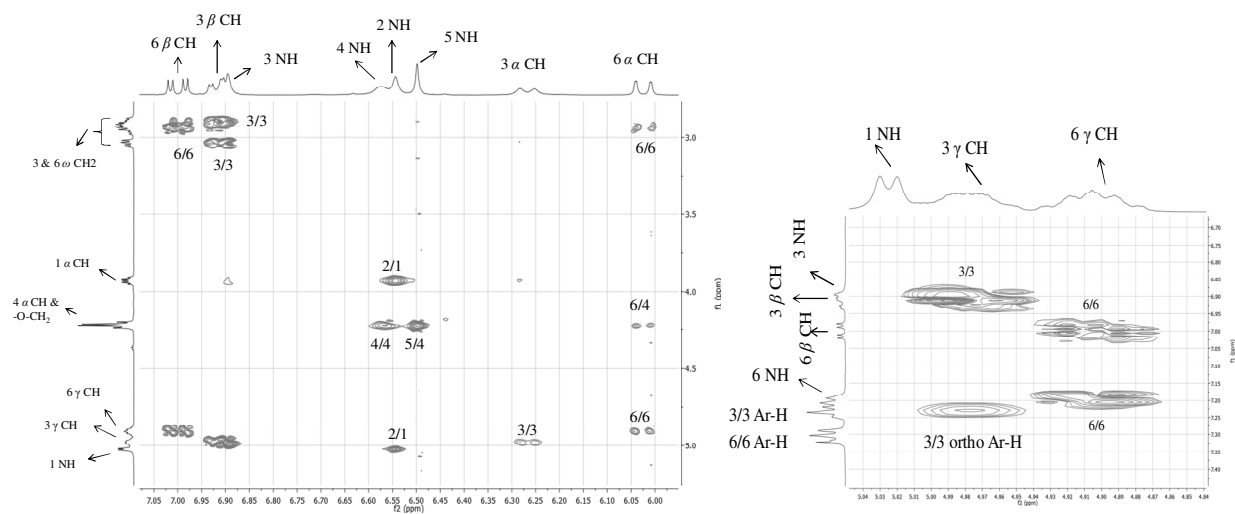

**Figure S7:** Partial ROESY spectrum of Peptide **P1**.

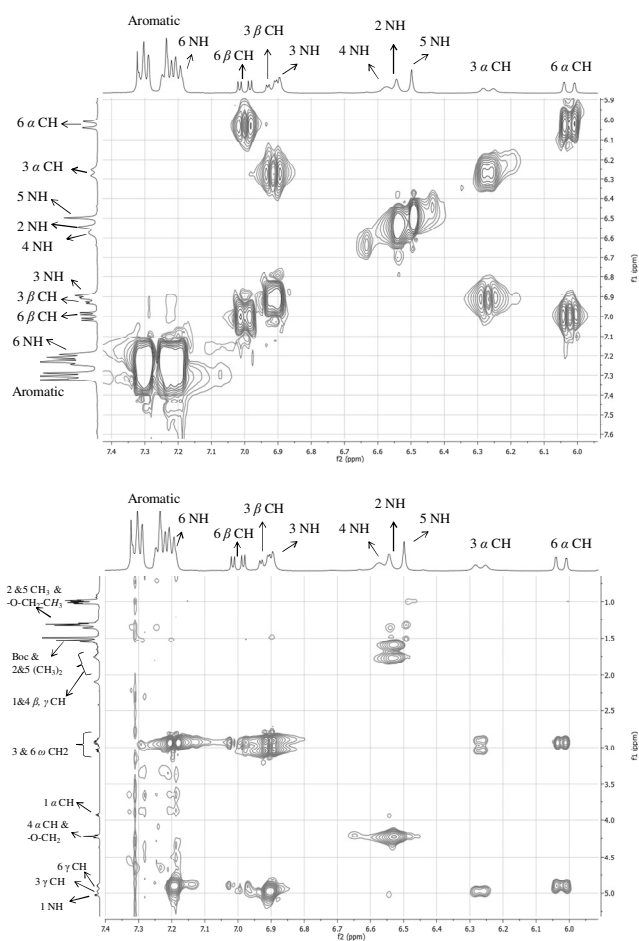

**Figure S8:** Partial ROESY spectrum of Peptide **P1**.



**Table S6:** List of NOE's observed in ROESY spectrum of **P2**

| Residue          | H-atom                          | Residue          | H-atom                          | NOE observed |
|------------------|---------------------------------|------------------|---------------------------------|--------------|
| Leu (1)          | NH                              | Aib (2)          | NH                              | Strong       |
| Leu (1)          | $\alpha$ CH                     | Aib (2)          | NH                              | Strong       |
| Leu (1)          | NH                              | Aib (2)          | (CH <sub>3</sub> ) <sub>2</sub> | Medium       |
| Leu (1)          | NH                              | Leu (1)          | $\beta$ CH                      | Strong       |
| Leu (1)          | NH                              | Leu (1)          | $\gamma$ CH                     | Weak         |
| Aib(2)           | NH                              | d $\gamma$ A (3) | NH                              | Weak         |
| Aib(2)           | NH                              | Aib (2)          | (CH <sub>3</sub> ) <sub>2</sub> | Strong       |
| Aib(2)           | (CH <sub>3</sub> ) <sub>2</sub> | d $\gamma$ A (3) | NH                              | Strong       |
| Aib(2)           | (CH <sub>3</sub> ) <sub>2</sub> | d $\gamma$ A (3) | $\alpha$ CH                     | Weak         |
| Aib(2)           | (CH <sub>3</sub> ) <sub>2</sub> | d $\gamma$ A (3) | $\gamma$ CH                     | Weak         |
| d $\gamma$ A (3) | NH                              | d $\gamma$ A (3) | CH <sub>3</sub>                 | Strong       |
| d $\gamma$ A (3) | $\beta$ CH                      | d $\gamma$ A (3) | CH <sub>3</sub>                 | Strong       |
| d $\gamma$ A (3) | $\beta$ CH                      | d $\gamma$ A (6) | CH <sub>3</sub>                 | Strong       |
| d $\gamma$ A (3) | $\alpha$ CH                     | Leu (4)          | NH                              | Strong       |
| d $\gamma$ A (3) | $\alpha$ CH                     | d $\gamma$ A (3) | NH                              | Strong       |
| d $\gamma$ A (3) | $\alpha$ CH                     | d $\gamma$ A (3) | CH <sub>3</sub>                 | Medium       |
| Leu (4)          | NH                              | Leu (4)          | $\beta$ CH                      | Medium       |
| Leu (4)          | NH                              | Leu (4)          | $\gamma$ CH                     | Medium       |
| Leu (4)          | $\alpha$ CH                     | Aib (5)          | NH                              | Strong       |
| Leu (4)          | $\alpha$ CH                     | Leu (4)          | $\delta$ CH                     | Strong       |
| Aib (5)          | NH                              | d $\gamma$ A (6) | NH                              | Medium       |
| Aib (5)          | NH                              | Aib (5)          | (CH <sub>3</sub> ) <sub>2</sub> | Strong       |
| Aib (5)          | (CH <sub>3</sub> ) <sub>2</sub> | d $\gamma$ A (6) | NH                              | Strong       |
| Aib (5)          | (CH <sub>3</sub> ) <sub>2</sub> | d $\gamma$ A (6) | $\alpha$ CH                     | Weak         |
| Aib (5)          | (CH <sub>3</sub> ) <sub>2</sub> | d $\gamma$ A (6) | $\gamma$ CH                     | Strong       |
| d $\gamma$ A (6) | $\alpha$ CH                     | d $\gamma$ A (6) | NH                              | medium       |
| dgA (6)          | $\alpha$ CH                     | dgA (6)          | CH <sub>3</sub>                 | Weak         |
| dgA (6)          | NH                              | dgA (6)          | CH <sub>3</sub>                 | Strong       |
| dgA (6)          | $\beta$ CH                      | dgA (6)          | CH <sub>3</sub>                 | Strong       |

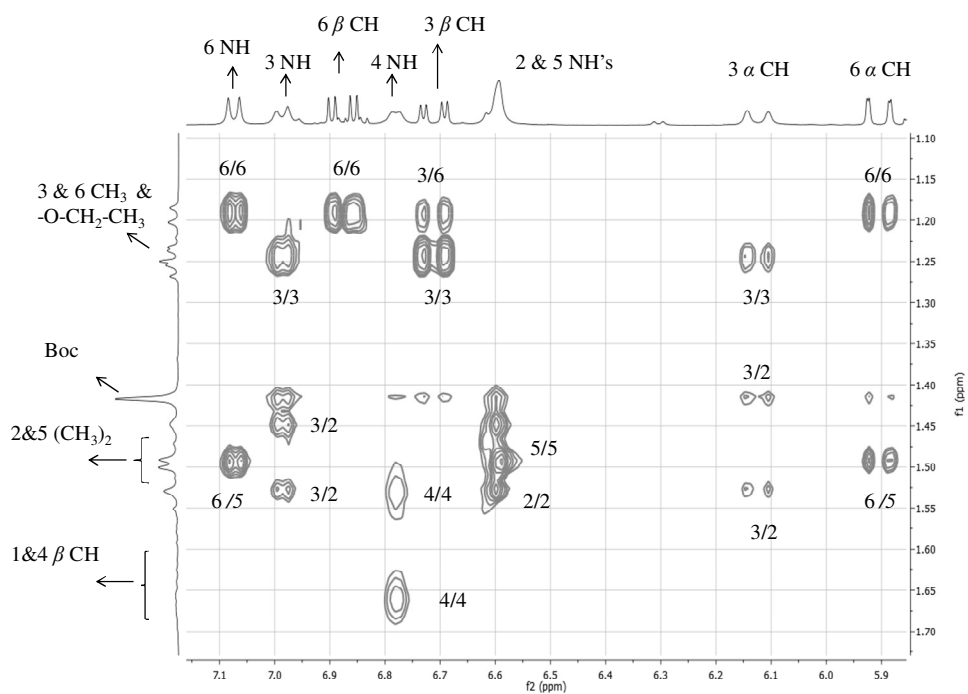

**Figure S9:** Partial ROESY spectrum of Peptide **P2**.

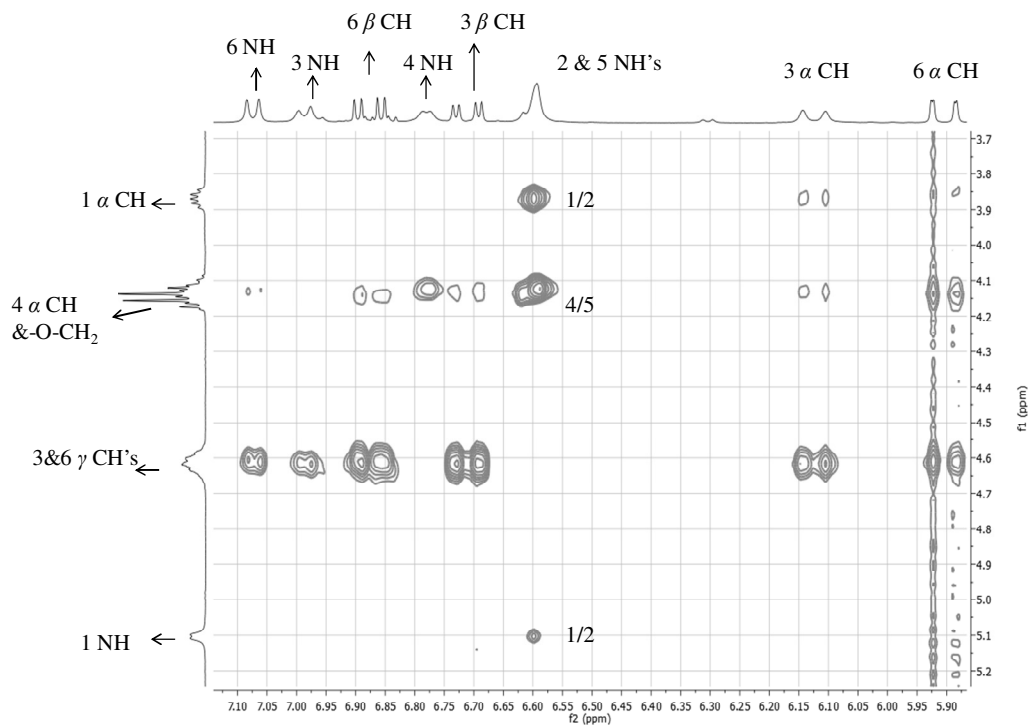

**Figure S10:** Partial ROESY spectrum of Peptide **P2**.

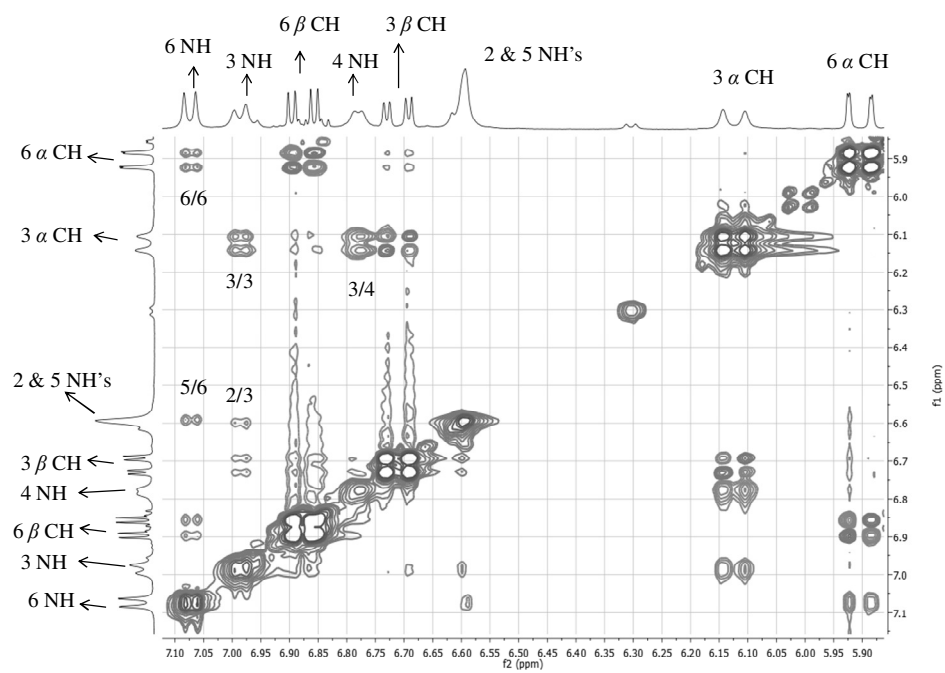

**Figure S11:** Partial TOCSY spectrum of Peptide **P2**.

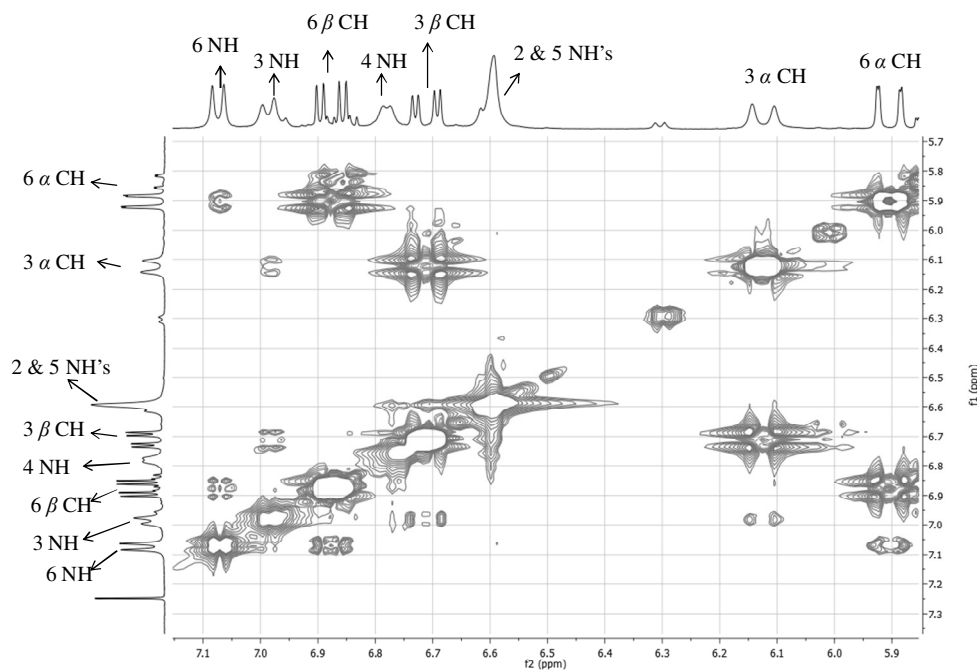

**Figure S12:** Partial TOCSY spectrum of Peptide **P2**.

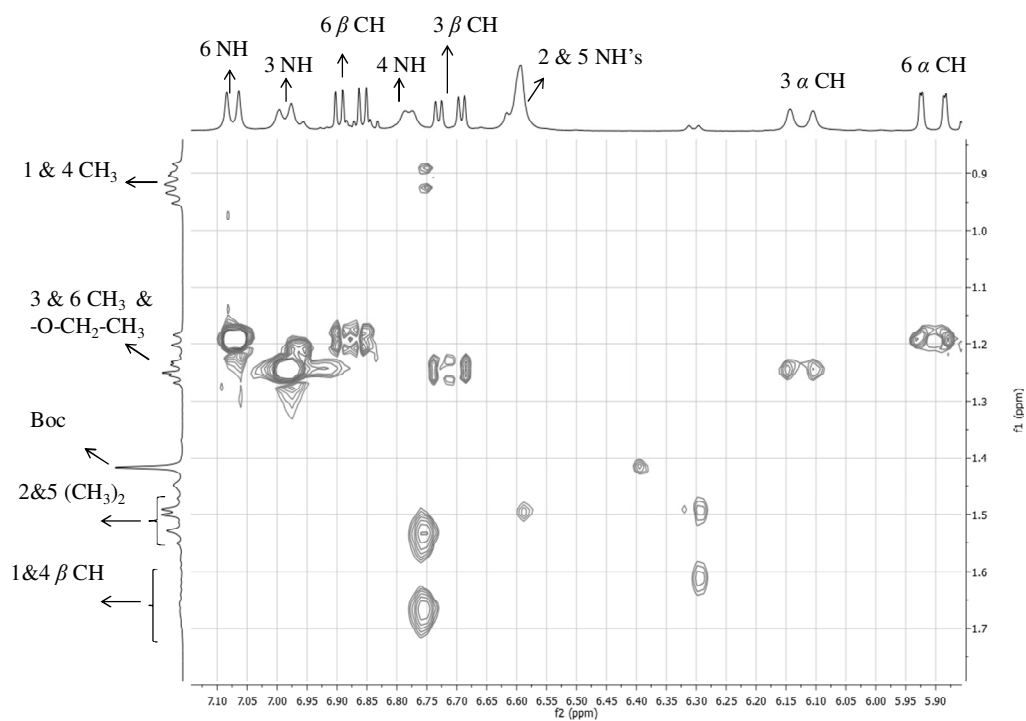

**Figure S13:** Partial TOCSY spectrum of Peptide **P2**.

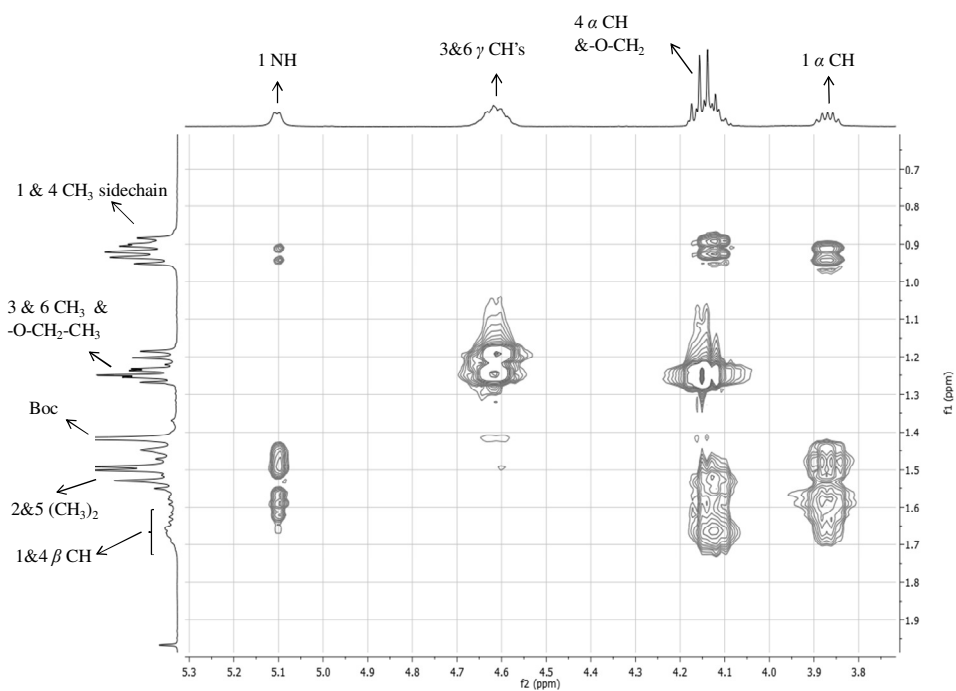

**Figure S14:** Partial TOCSY spectrum of Peptide **P2**.

iii)

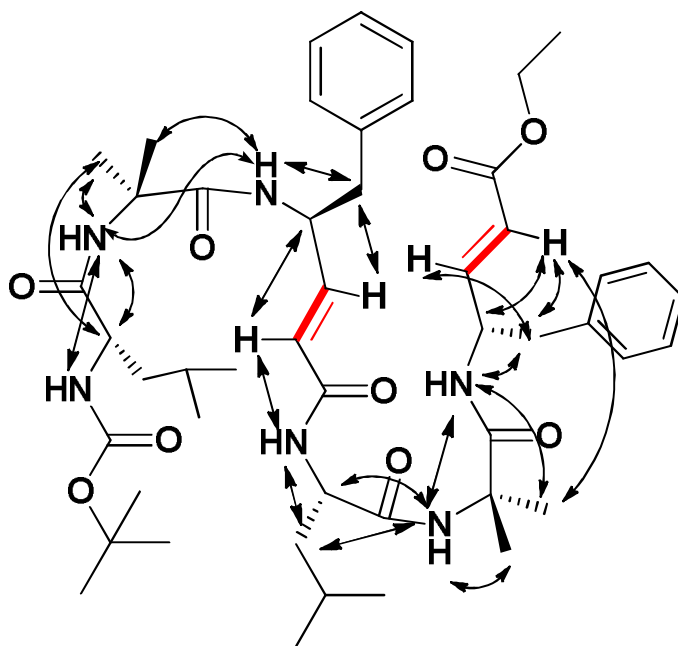

**Figure S15: A)** Observed NOEs of the peptide **P1** in the ROESY are schematically represented by double headed arrows.

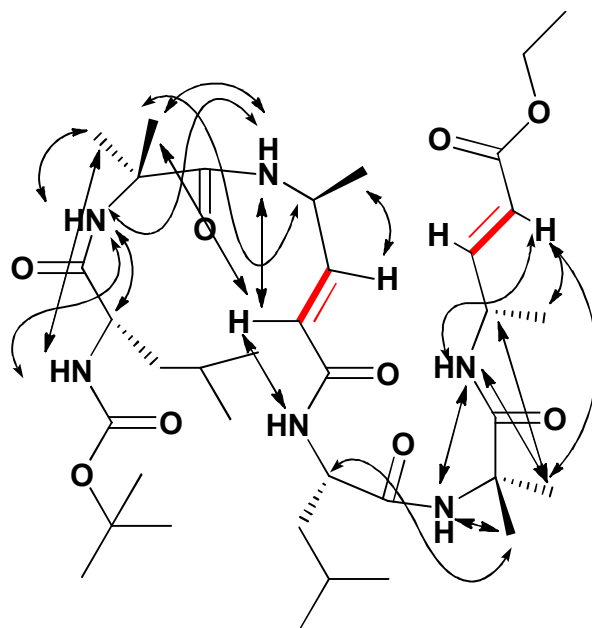

**Figure S15: B)** Observed NOEs of the peptide **P2** in the ROESY are schematically represented by double headed arrows.

**Molecular Dynamics (MD):** Model building and molecular dynamics simulation of **P1** and **P2** was carried out using Insight II (97.0) / Discover program on a Silicon Graphics Octane workstation. The cvff force field with default parameters was used throughout the simulations. Minimization's were done first with steepest decent, followed by conjugate gradient methods for a maximum of 1000 iterations each or RMS deviation of 0.001 kcal/mol, whichever was earlier. The energy-minimized structures were then subjected to MD simulations. A number of inter atomic distance constraints obtained from NMR data were used as restraints in the minimization as well as MD runs. For MD runs, a temperature of 300 K was used. The molecules were initially equilibrated for 50 ps and subsequently subjected to a 1 ns dynamics with a step size of 1 fs, sampling the trajectory at equal intervals of 10 ps. In trajectory 50 samples were generated and the best structures were again energy minimized with above protocol and superimposed these structures.

## 7. Synthesis and Characterization of Boc-d $\gamma$ F-OEt, Boc-d $\gamma$ A-OEt and Peptides P1-P4

*Synthesis of Boc-d $\gamma$ X-OEt:*<sup>3</sup> *N*-Boc-Amino aldehyde (10 mmol) was dissolved in 30 mL of dry THF followed by Wittig ylide (11 mmol) was added at RT. Reaction mixture was stirred for about 5 hrs at RT. Completion of the reaction was monitored by TLC. After completion, solvent was evaporated and the crude product was purified by column chromatography using EtOAc/pet ether to get (88%) of pure product.

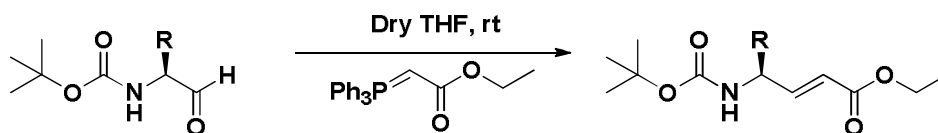

*(S,E)-ethyl 4-((tert-butoxycarbonyl)amino)-5-phenylpent-2-enoate:*<sup>3</sup> White powder solid; Yield 88%; <sup>1</sup>H NMR (400 MHz, CDCl<sub>3</sub>)  $\delta$  7.30-7.14 (m, 5H), 6.89 (dd, *J*=16 Hz, *J*=4 Hz, 1H), 5.84 (dd, *J*=16 Hz, *J*=2 Hz, 1H), 4.59 (b, 1H), 4.16 (q, *J*=7 Hz, 2H), 2.88 (m, 2H), 1.37 (s, 9H), 1.25 (t, *J*=7.1 Hz, 3H); <sup>13</sup>CNMR (100 MHz, CDCl<sub>3</sub>)  $\delta$  166.3, 155.2, 147.6, 136.4, 129.4, 128.6, 126.9,

121.1, 79.9, 60.5, 52.3, 40.9, 28.3, 14.2; MALDI TOF/TOF  $m/z$  calculated value for  $C_{18}H_{25}NO_4$   $[M+Na^+]$  342.1676 and observed 342.1657.

*(S,E)-ethyl 4-((tert-butoxycarbonyl)amino)pent-2-enoate*:<sup>3</sup>Colourless Oil; Yield 93%;  $^1H$  NMR(400 MHz,  $CDCl_3$ ) $\delta$  6.87-6.82 (dd,  $J = 16$  Hz,  $J = 4$  Hz, 1H), 5.89-5.85 (d,  $J = 16$  Hz, 1H), 4.5 (br, 1H), 4.38 (br, 1H), 4.19-4.14(q,  $J = 8$  Hz, 2H), 1.43 (s, 9H), 1.26-1.24 (m, 6H);  $^{13}C$  NMR(100 MHz,  $CDCl_3$ ) 166.4, 154.9, 120.2, 79.8, 60.5, 47.0, 28.4, 20.4, 14.3;MALDI.TOF/TOF $m/z$  Calculated value for  $C_{12}H_{21}NO_4[M+Na]^+$  266.1368 and Observed266.1365.

*Procedure for the synthesis of Boc-L-U-d $\gamma$ X-L-U-d $\gamma$ X-OEt*:Tripeptide and hexapeptide were prepared by conventional solution-phase fragment condensation strategy. Deprotections were performed with trifluoroacetic acid and saponification for *N*- and *C*-termini respectively. Couplings were carried out using dicyclohexcarbodiimide (DCC) and 1-hydroxybenzotriazole (HOBt). Tripeptide was synthesised using 1+2 condensation strategy involving Boc-Leu-OH and  $NH_2$ -U-d $\gamma$ F-OEt. Hexapeptide was synthesized by 3+3 condensation strategy involving Boc-L-U-d $\gamma$ X-COOH and  $NH_2$ -L-U-d $\gamma$ X-OEt. All peptides were purified by RP-HPLC using MeOH/ $H_2O$  system.

*Boc-LUd $\gamma$ F-OEt*:White solid; yield 88%; $^1H$  NMR (400 MHz,  $CDCl_3$ )  $\delta$  7.30 (bs, 1H), 7.29-7.17 (m, 5H), 7.06 (d,  $J=7.8$  Hz, 1H), 6.92 (dd,  $J = 15.8$  Hz,  $J = 4.8$  Hz, 1H), 6.47 (bs, 1H) 5.90 (d,  $J = 15.57$  Hz, 1H), 4.90 (m, 2H), 4.16(q, 2H,  $J = 8$  Hz), 2.91 (m, 2H) , 1.65 (m, 2H), 1.50-1.40 (m, 16H), 1.26 (t,  $J = 7.1$ , 3H), 0.94(m, 6H); $^{13}C$  NMR (100 MHz,  $CDCl_3$ )  $\delta$  173.53, 172.38, 147.05, 136.92, 129.35, 128.56, 126.83, 121.21, 80.82, 60.44, 57.54, 54.05, 53.53, 51.26, 40.62, 40.17, 34.03, 28.35, 25.61, 25.46, 25.03, 24.86, 23.03, 21.92, 14.33;HR-MS $m/z$  calculated for  $C_{28}H_{43}N_3O_6$   $[M+Na]^+$  540.3050, observed 540.3057.

*Boc-LUd $\gamma$ A-OEt*: $^1H$  NMR (400 MHz,  $CDCl_3$ )  $\delta$  7.08 (d,  $J = 8$  Hz, 1H), 6.88 (dd,  $J = 16$  Hz,  $J = 4$  Hz, 1H), 6.48 (s, 1H), 5.92 (d,  $J = 16$  Hz, 1H), 4.99 (bs, 1H), 4.65 (m, 1H), 4.16 (q,  $J = 8$  Hz, 2H), 3.90 (m, 1H), 1.65 (m, 2H), 1.52 (s, 3H), 1.51 (s, 3H), 1.42 (s, 9H), 1.26 (m, 6H), 0.93 (m, 6H);  $^{13}C$ NMR (100 MHz,  $CDCl_3$ )  $\delta$  173.5, 172.2, 166.7, 156.3, 149.1, 120.4, 80.8, 60.5, 57.5, 54.4, 46.1, 40.3, 28.4, 25.8, 24.9, 23.0, 22.0, 20.0, 14.4; HR-MS  $m/z$  value calculated for  $C_{22}H_{39}N_3O_6$   $[M+Na^+]$  464.2736, observed 464.2740.

*Boc-L-U-dyF-L-U-dyF-OEt (P1)*: White color solid; Yield 50%;  $^1\text{H NMR}$  (500 MHz,  $\text{CDCl}_3$ )  $\delta$  7.12-7.02 (m, 11H), 6.66 (dd,  $J=15.6$  Hz,  $J=5$  Hz, 1H), 6.77 (m, 2H), 6.43 (b, 1H), 6.40 (s, 1H), 6.35 (s, 1H), 6.13 (d,  $J=15$  Hz, 1H), 5.88 (dd,  $J=16$  Hz,  $J=1$  Hz, 1H), 4.88 (d,  $J=5$  Hz, 1H), 4.83 (m, 1H), 4.76 (m, 1H), 4.07 (m, 2H), 3.78 (m, 1H), 2.91-2.73 (m, 4H), 1.66-1.42 (m, 6H), 1.40-1.16 (m, 25H), 0.86 (m, 12H); HR-MS  $m/z$  calculated value for  $\text{C}_{49}\text{H}_{72}\text{N}_6\text{O}_9$   $[\text{M}+\text{Na}^+]$  911.5253, observed 912.5266.

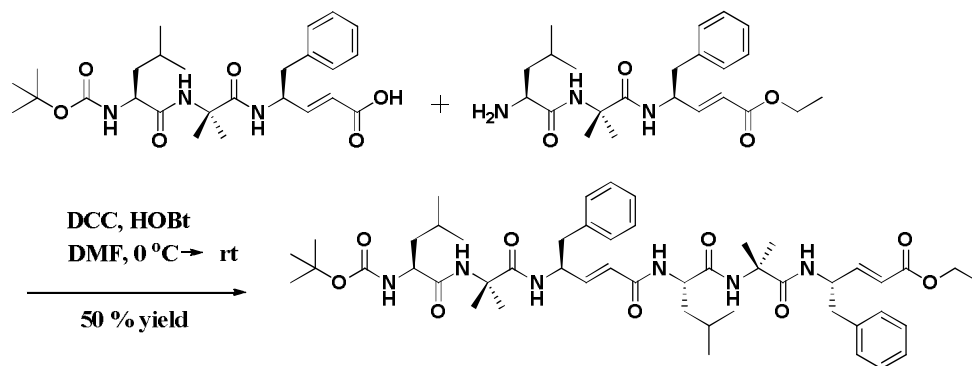

*Boc-L-U-dyA-L-U-dyA-OEt (P2)*: White color solid; Yield 72%;  $^1\text{H NMR}$  (400 MHz,  $\text{CDCl}_3$ )  $\delta$  7.09 (d,  $J = 8$  Hz, 1H), 7.01 (d,  $J = 8$  Hz, 1H), 6.93 (d,  $J = 4$  Hz, 1H), 6.89 (d,  $J = 4$  Hz, 1H), 6.80 (d,  $J = 4$  Hz, 1H), 6.76 (d,  $J = 4$  Hz, 1H), 6.72 (d,  $J = 8$  Hz, 1H), 6.58 (s, 1H), 6.57 (s, 1H), 6.14 (d,  $J = 16$  Hz, 1H), 5.93 (d,  $J = 16$  Hz, 1H), 5.08 (d,  $J = 4$  Hz, 1H), 4.70-4.60 (m, 2H), 4.20-4.12 (m, 4H), 3.92-3.87 (m, 1H), 1.74-1.47 (m, 22H), 1.44 (s, 9H), 1.29-1.21 (m, 11H), 0.98-0.91 (m, 15H); HR-MS  $m/z$  calculated value for  $\text{C}_{37}\text{H}_{64}\text{N}_6\text{O}_9$   $[\text{M}+\text{Na}^+]$  759.4632, observed 759.4623.

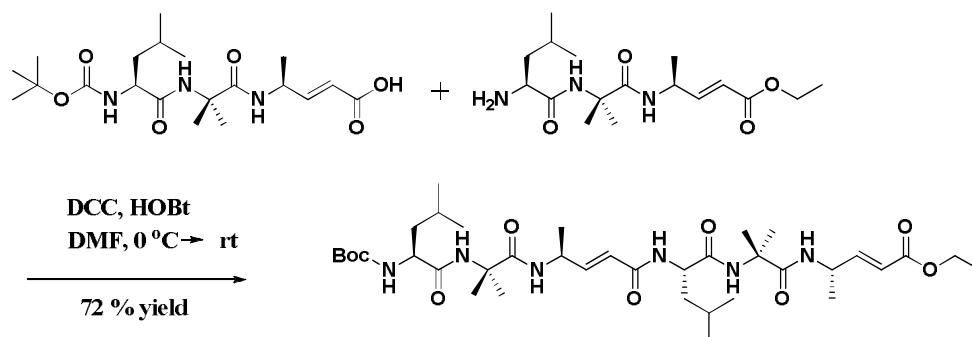

*Transformation of  $\beta$ -miniature peptides into their saturated analogs of 10/12-helices through catalytic hydrogenation*: Boc-L-U-dyX-L-U-dyX-OEt (0.10 mmol, 100



mg) was dissolved in EtOH (4 mL), and was treated with 20 mg of 20% Pd/C. The hydrogen gas was supplied through balloon. The reaction mixture was stirred under hydrogen atmosphere for about 5 h. The completion of the reaction was monitored by MALDI-TOF/TOF and RP-HPLC. After the completion of reaction, the reaction mixture was diluted with EtOH (10 mL) and it was filtered through sintered funnel using celite bed and celite bed was washed with EtOH (3 × 15 mL). The filtrate was evaporated under *vacuum* to get white crystalline pure product.

**Boc-L-U- $\gamma$ F-L-U- $\gamma$ F-OEt (P3):** White color solid; Yield 90%;  $^1\text{H NMR}$  (500 MHz,  $\text{CDCl}_3$ )  $\delta$  7.92 (bs, 1H), 7.62 (bs, 1H), 7.40 (d,  $J = 15$  Hz), 7.29-7.10 (m, 11H), 6.92-6.90 (m, 2H), 6.74-6.63 (m, 2H), 5.53 (bs, 1H), 4.36-4.27 (m, 1H), 4.12-4.04 (m, 3H), 3.89-3.80 (m, 2H), 2.96-2.64 (m, 4H), 2.53-2.35 (m, 5H), 2.23-2.17 (m, 3H), 1.94-1.85 (m, 3H), 1.72-1.67 (m, 2H), 1.57 (s, 3H), 1.49 (s, 9H), 1.42 (s, 3H), 1.30 (s, 3H), 1.22 (t,  $J = 5$  Hz, 3H), 1.02 (s, 3H), 0.98-0.88 (m, 12H); HR-MS  $m/z$  calculated value for  $\text{C}_{49}\text{H}_{76}\text{N}_6\text{O}_9$  [ $\text{M}+\text{Na}^+$ ] 915.5571, observed 915.5574.

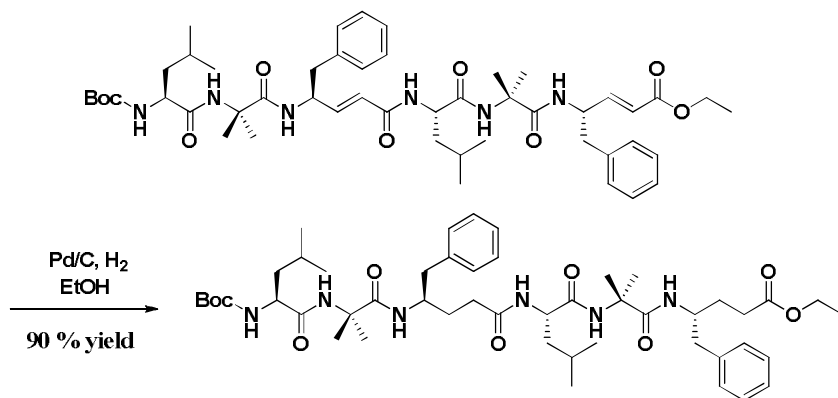

**Boc-L-U- $\gamma$ A-L-U- $\gamma$ A-OEt (P4):** White color solid; Yield 95%;  $^1\text{H NMR}$  (400 MHz,  $\text{CDCl}_3$ )  $\delta$  8.03 (s, 1H), 7.15 (s, 1H), 7.08 (s, 1H), 6.83 (d,  $J = 10$  Hz, 1H), 6.63 (s, 1H), 5.10 (d,  $J = 5$  Hz, 1H), 4.13-4.06 (m, 2H), 4.03-3.86 (m, 5H), 2.55-2.34 (m, 4H), 2.16-2.13 (m, 1H), 2.03-1.97 (m, 1H), 1.86-1.73 (m, 10H), 1.60 (s, 3H), 1.53 (s, 3H), 1.48 (s, 9H), 1.44 (s, 3H), 1.37 (s, 3H), 1.23 (t,  $J = 5$  Hz), 1.14 (d,  $J = 5$  Hz, 3H), 1.04 (d,  $J = 5$  Hz, 3H), 1.00-0.90 (m, 14H); HR-MS  $m/z$  calculated value for  $\text{C}_{37}\text{H}_{68}\text{N}_6\text{O}_9$  [ $\text{M}+\text{Na}^+$ ] 763.4945, observed 763.4940.

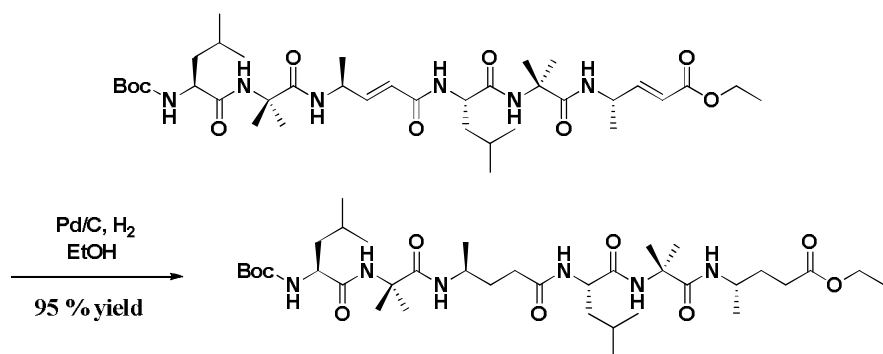

## 9. CD spectra of peptides

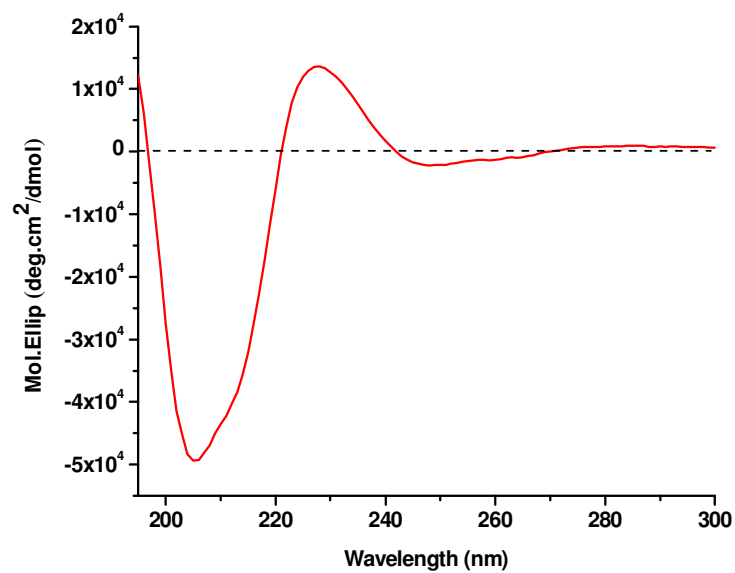

**Figure S16:** CD spectrum of peptide **P1** in methanol (*c* 0.2 mM).

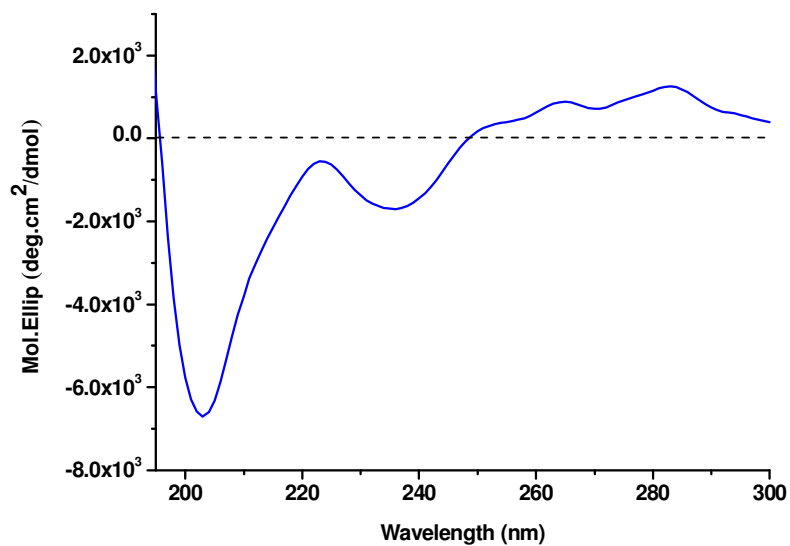

**Figure S17:** CD spectrum of peptide **P2** in methanol (*c* 0.2 mM).

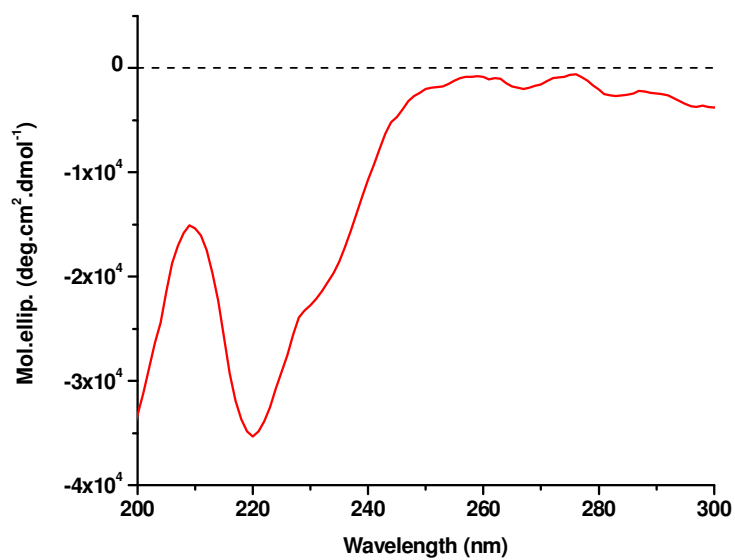

**Figure S18:** CD spectrum of peptide **P3** in methanol (*c* 0.2 mM).

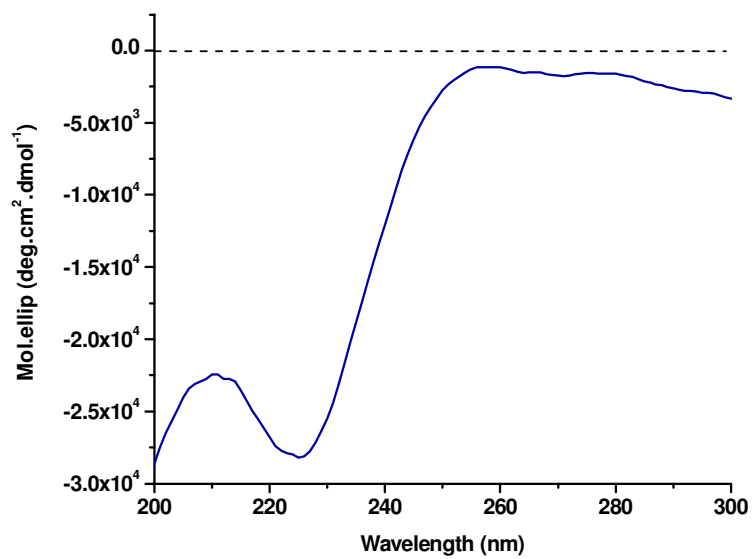

**Figure S19:** CD spectrum of peptide **P4** in methanol (*c* 0.2 mM).

## 10. HPLC traces of peptides

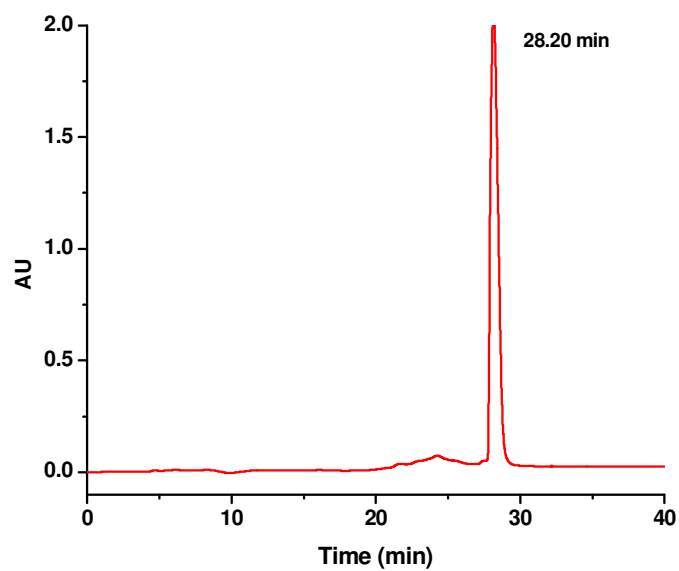

**Figure S20:** HPLC trace of peptide **P1**.

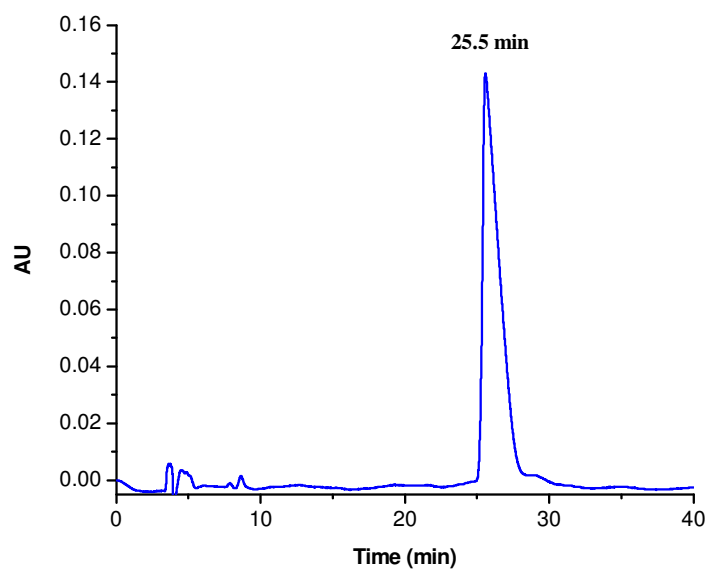

**Figure S21:** HPLC trace of peptide **P2**.

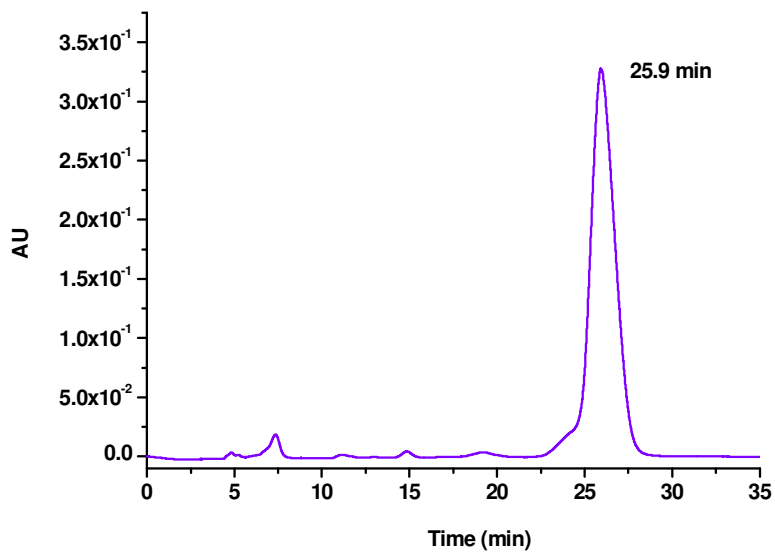

**Figure S22:** HPLC trace of peptide **P3**.

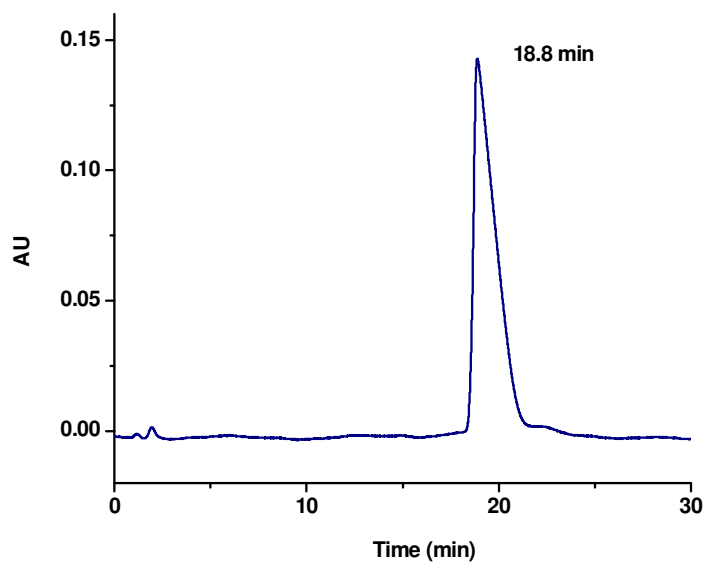

**Figure S23:** HPLC trace of peptide **P4**.

## 11. Variable Temperature Study of Beta-meanders

### Peptide P1:

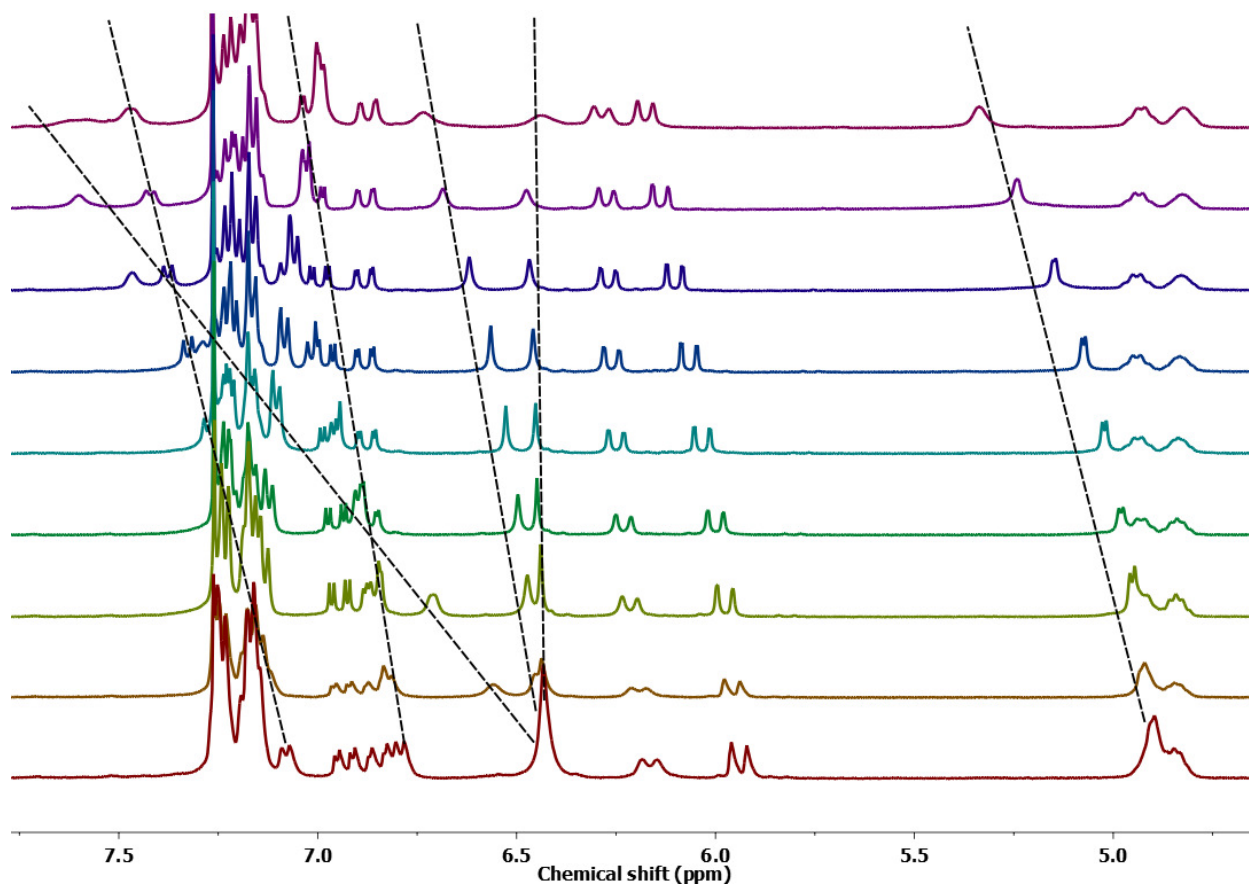

**Figure S24:** Temperature dependent  $^1\text{H}$  NMR spectra of amide NH region of **P1**.

**Table S7:** Chemical shifts of amide NHs of peptide **P1**

| Temperature<br>( $^{\circ}\text{C}$ ) | Leu1 | Aib2 | d $\gamma$ F3 | Leu4 | Aib5 | d $\gamma$ F6 |
|---------------------------------------|------|------|---------------|------|------|---------------|
| -40                                   | 5.34 | 6.73 | 6.99          | 7.59 | 6.44 | 7.47          |
| -30                                   | 5.24 | 6.69 | 7.03          | 7.60 | 6.48 | 7.42          |
| -20                                   | 5.15 | 6.62 | 7.06          | 7.47 | 6.47 | 7.38          |
| -10                                   | 5.08 | 6.57 | 7.02          | 7.29 | 6.46 | 7.33          |
| 0                                     | 5.03 | 6.53 | 6.95          | n.d  | 6.45 | n.d           |

|                                       |                          |                          |                          |                           |                          |                          |
|---------------------------------------|--------------------------|--------------------------|--------------------------|---------------------------|--------------------------|--------------------------|
| 10                                    | 4.98                     | 6.50                     | 6.90                     | n.d                       | 6.45                     | n.d                      |
| 20                                    | 4.96                     | 6.47                     | 6.85                     | 6.71                      | 6.44                     | n.d                      |
| 30                                    | 4.93                     | 6.46                     | 6.82                     | 6.56                      | 6.44                     | n.d                      |
| 40                                    | 4.89                     | 6.43                     | 6.78                     | 6.43                      | 6.43                     | 7.08                     |
| <b>dδ/dT<br/>(ppb K<sup>-1</sup>)</b> | <b>-5.4<br/>(± 0.49)</b> | <b>-3.8<br/>(± 0.29)</b> | <b>-3.4<br/>(± 0.56)</b> | <b>-16.0<br/>(± 0.99)</b> | <b>-0.4<br/>(± 0.17)</b> | <b>-4.9<br/>(± 0.75)</b> |

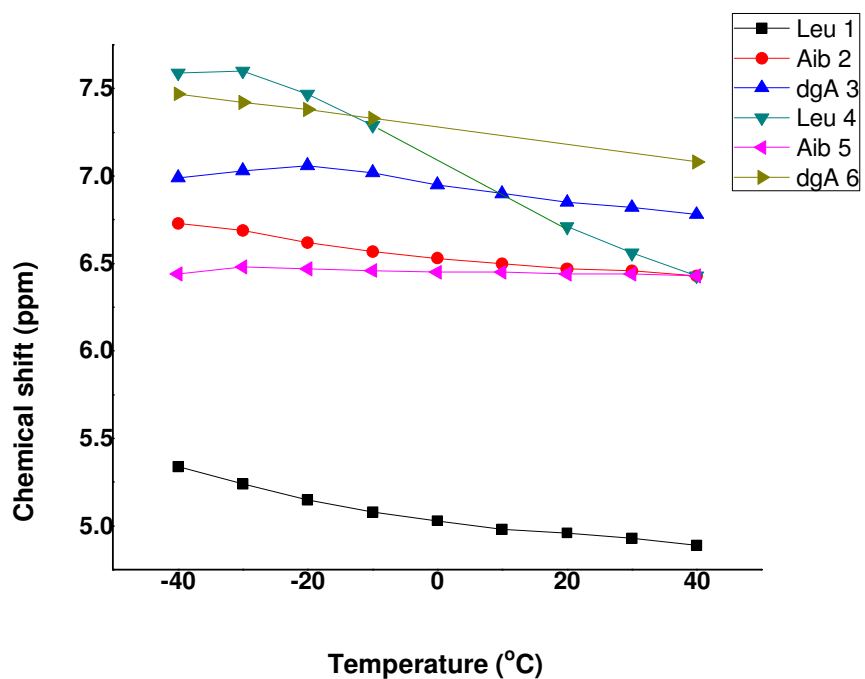

**Figure S25:** Plot of amides chemical shift and the temperature. The slope  $d\delta/dt$  for all NHs is given in the Table S5.



**Peptide P2:**

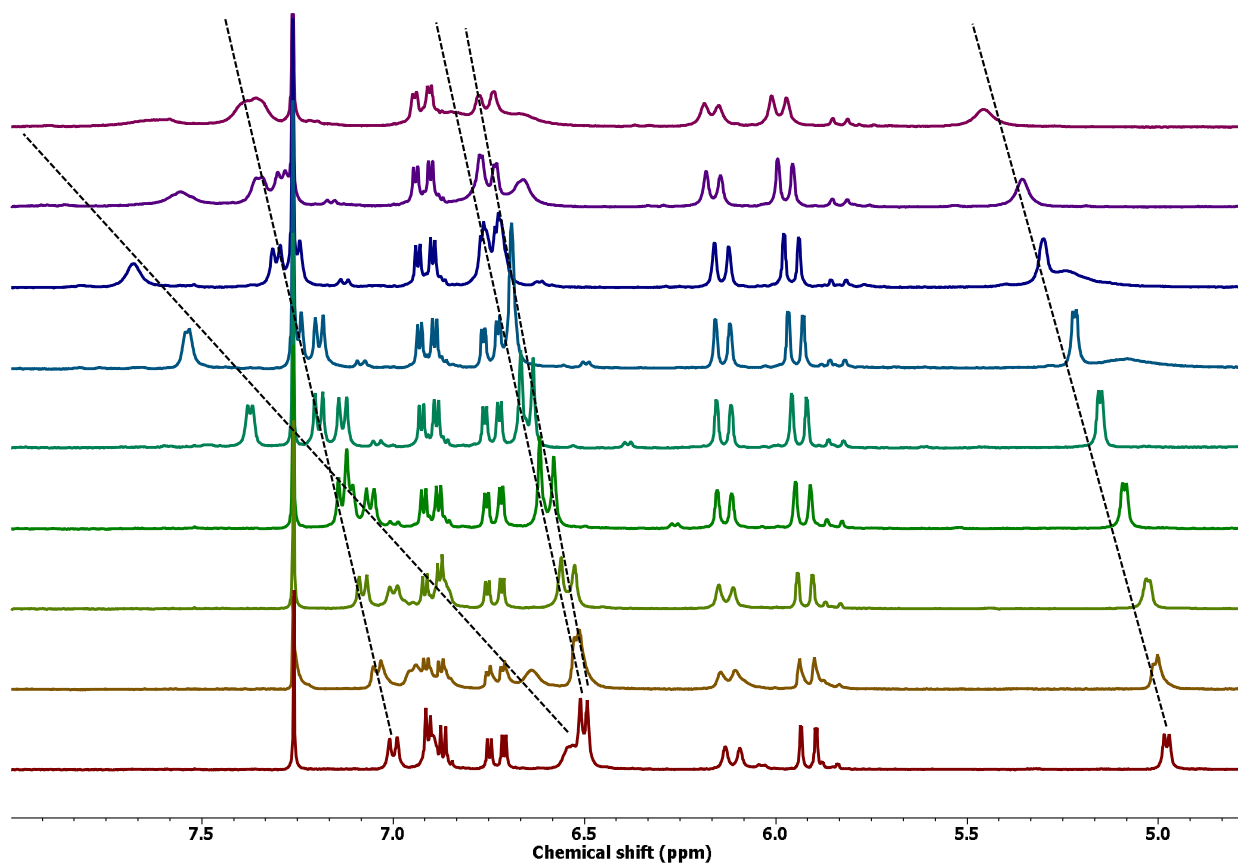

**Figure S26:** Temperature dependent  $^1\text{H}$  NMR spectra of amide NH region of **P3**

**Table S8:** Chemical shifts of amide NHs of peptide **P3**

| Temperature<br>( $^{\circ}\text{C}$ ) | Leu1 | Aib2 | $\text{d}\gamma\text{A3}$ | Leu4 | Aib5 | $\text{d}\gamma\text{A6}$ |
|---------------------------------------|------|------|---------------------------|------|------|---------------------------|
| -40                                   | 5.46 | 6.68 | 7.36                      | 7.58 | 6.84 | 7.36                      |
| -30                                   | 5.36 | 6.66 | 7.29                      | 7.55 | 6.67 | 7.35                      |
| -20                                   | 5.31 | 6.71 | 7.25                      | 7.68 | 6.75 | 7.30                      |
| -10                                   | 5.22 | 6.69 | 7.19                      | 7.54 | 6.69 | 7.25                      |
| 0                                     | 5.15 | 6.63 | 7.13                      | 7.38 | 6.67 | 7.19                      |
| 10                                    | 5.09 | 6.58 | 7.06                      | 7.11 | 6.62 | 7.13                      |

|                                       |                    |                     |                     |                     |                    |                     |
|---------------------------------------|--------------------|---------------------|---------------------|---------------------|--------------------|---------------------|
| 20                                    | 5.02               | 6.53                | 7.00                | 6.86                | 6.56               | 7.08                |
| 30                                    | 5.00               | 6.51                | 6.95                | 6.64                | 6.53               | 7.04                |
| 40                                    | 4.98               | 6.49                | 6.89                | 6.54                | 6.51               | 7.00                |
| <b>dδ/dT<br/>(ppb K<sup>-1</sup>)</b> | <b>-6.2 (±0.4)</b> | <b>-2.8 (±0.46)</b> | <b>-5.9 (±0.09)</b> | <b>-14.9 (±2.0)</b> | <b>-3.7 (±0.5)</b> | <b>-4.9 (±0.18)</b> |

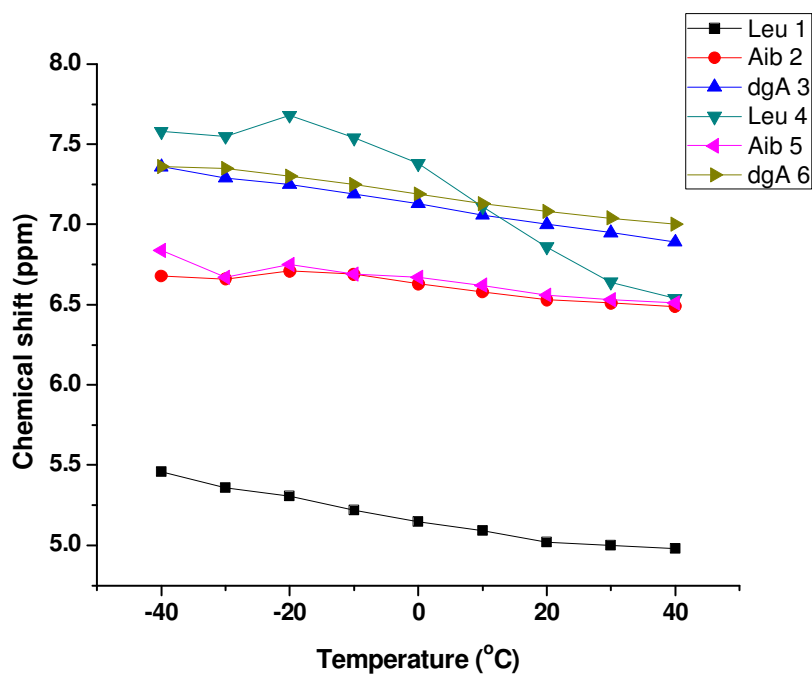

**Figure S27:** Plot of amides chemical shift and the temperature. The slope  $d\delta/dt$  for all NHs is given in the Table S7.

## 12. References:

1. (a) SHELXS-97: G. M. Sheldrick, *Acta Crystallogr. Sect A*, 1990, **46**, 467;(b) G. M. Sheldrick, SHELXL-97, Universität Göttingen (Germany) 1997.
2. Spek, A. L. (1990) *Acta. Cryst.*, A46, C34.
3. (a) S. M. Mali, A. Bandyopadhyay, S. V. Jadhav, M. GaneshKumar and H. N. Gopi, *Org. Biomol. Chem.*, 2011, **9**, 6566;(b) A. Bandyopadhyay and H. N. Gopi, *Org. Lett.*, 2012, **14**, 2770.

### 13. <sup>1</sup>H NMR and MALDI-TOF/TOF spectra of compounds

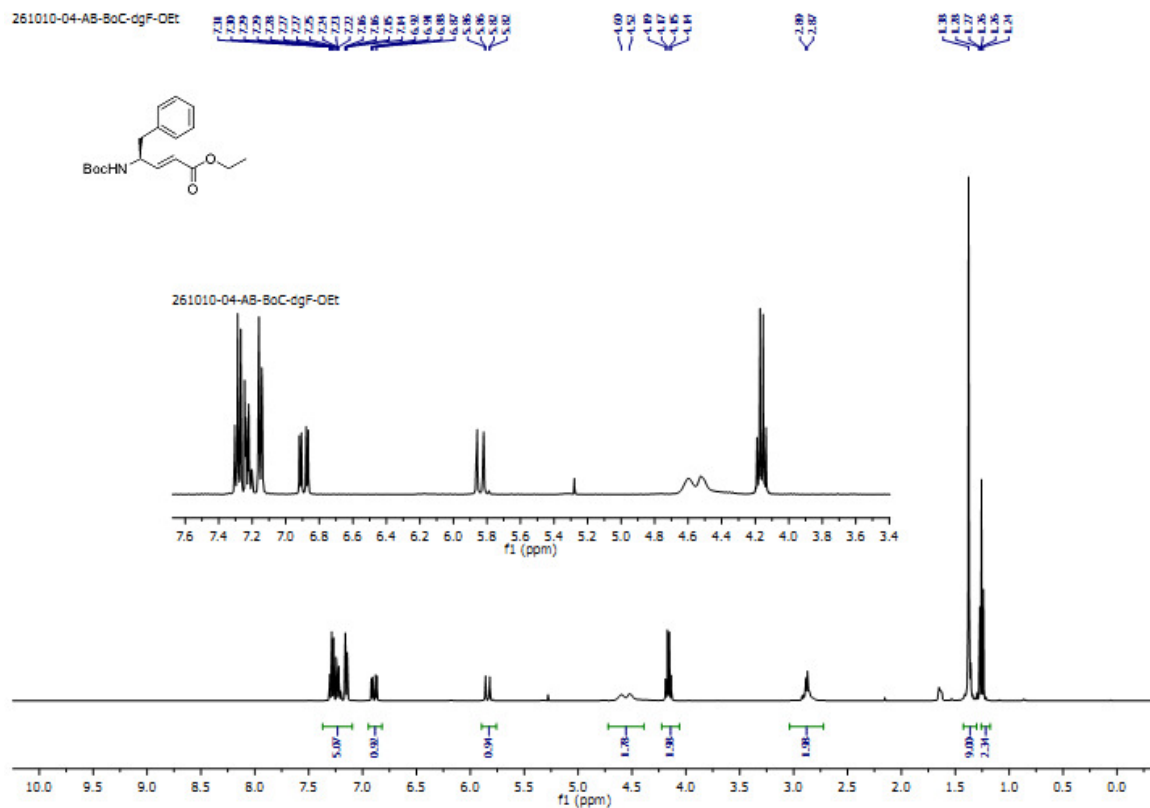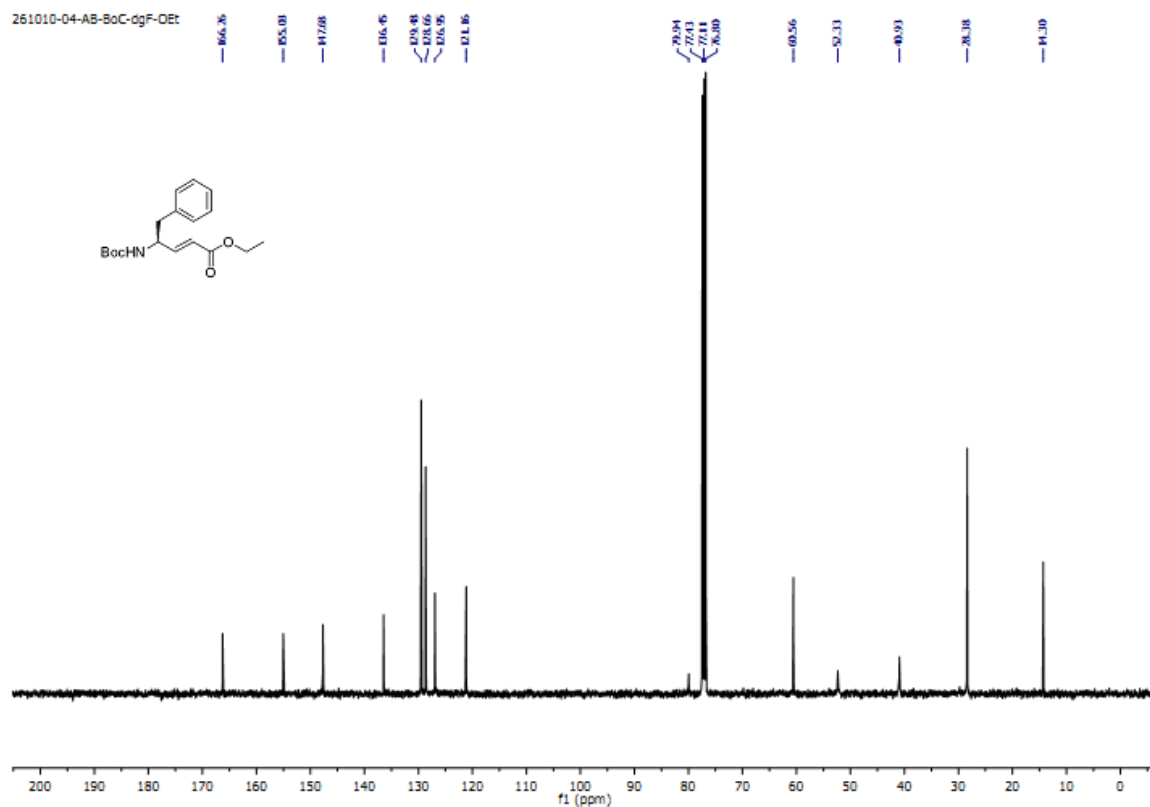

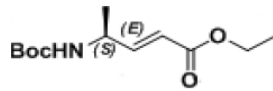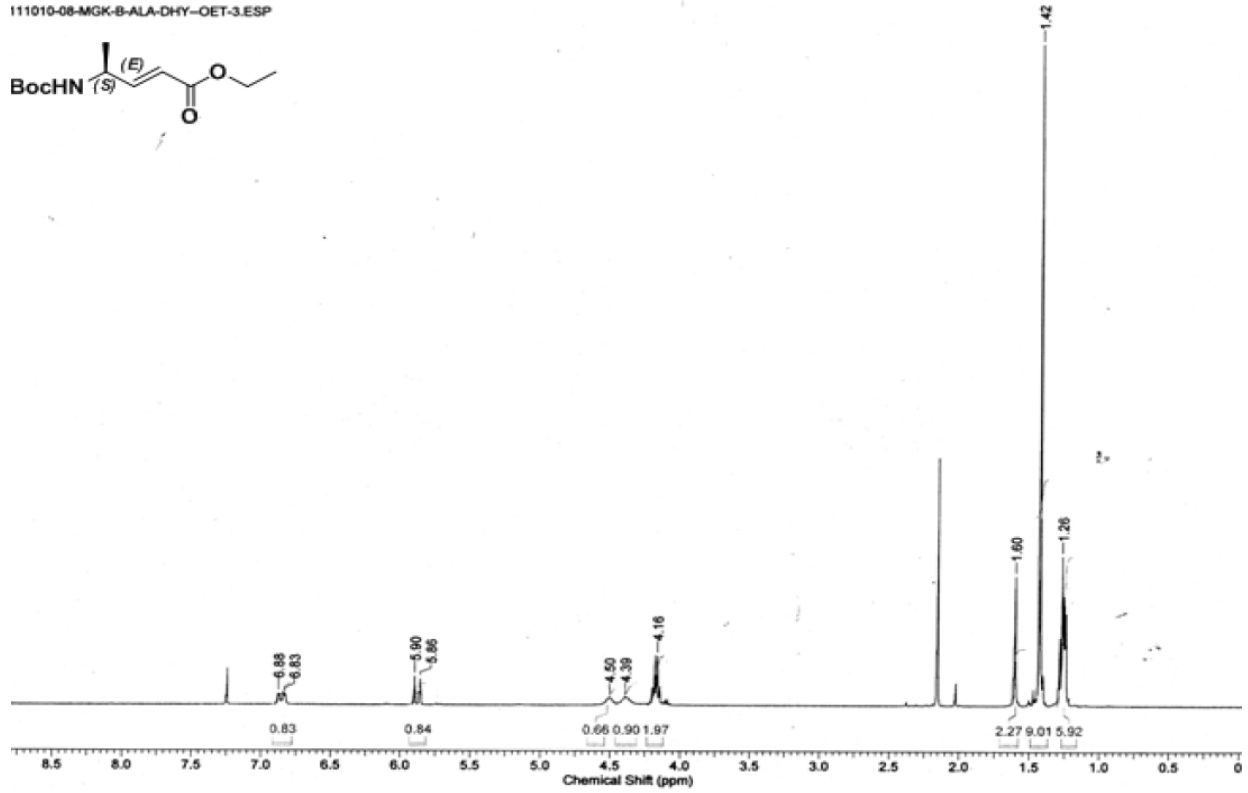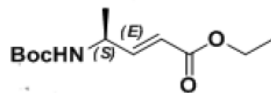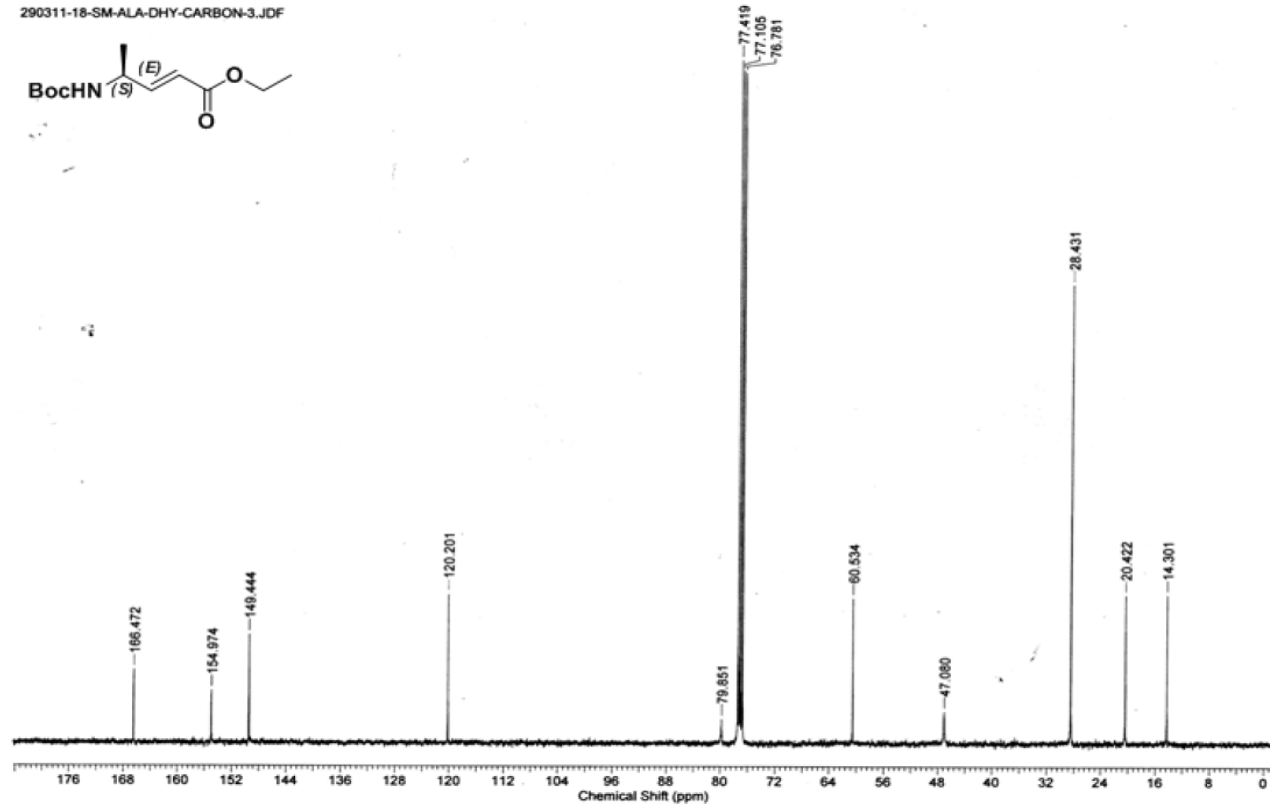

# Boc-LUdyF-OEt

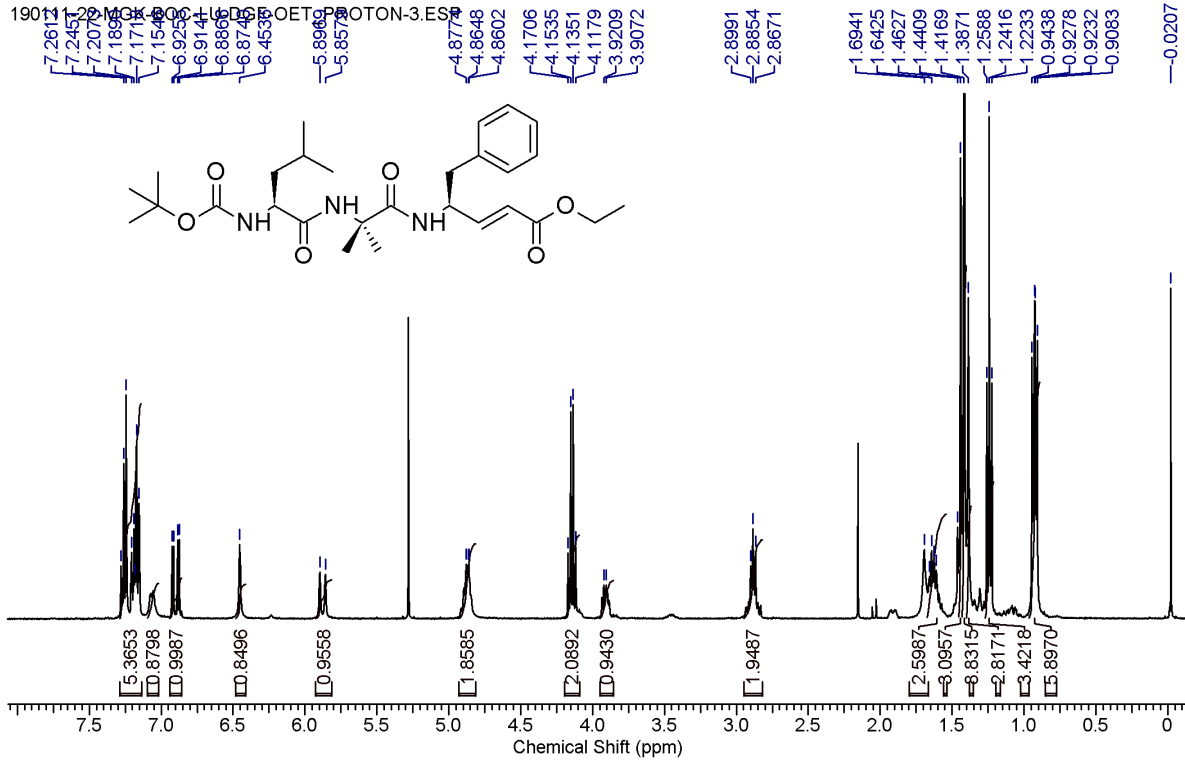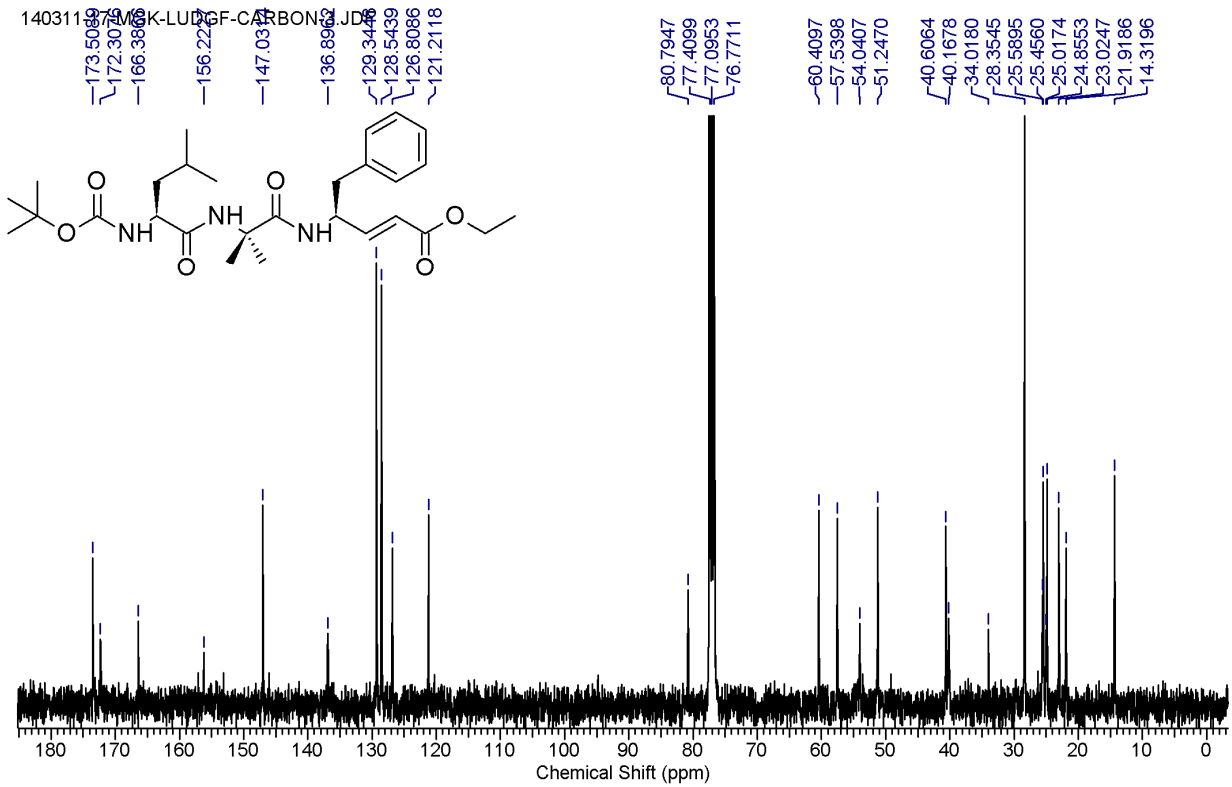

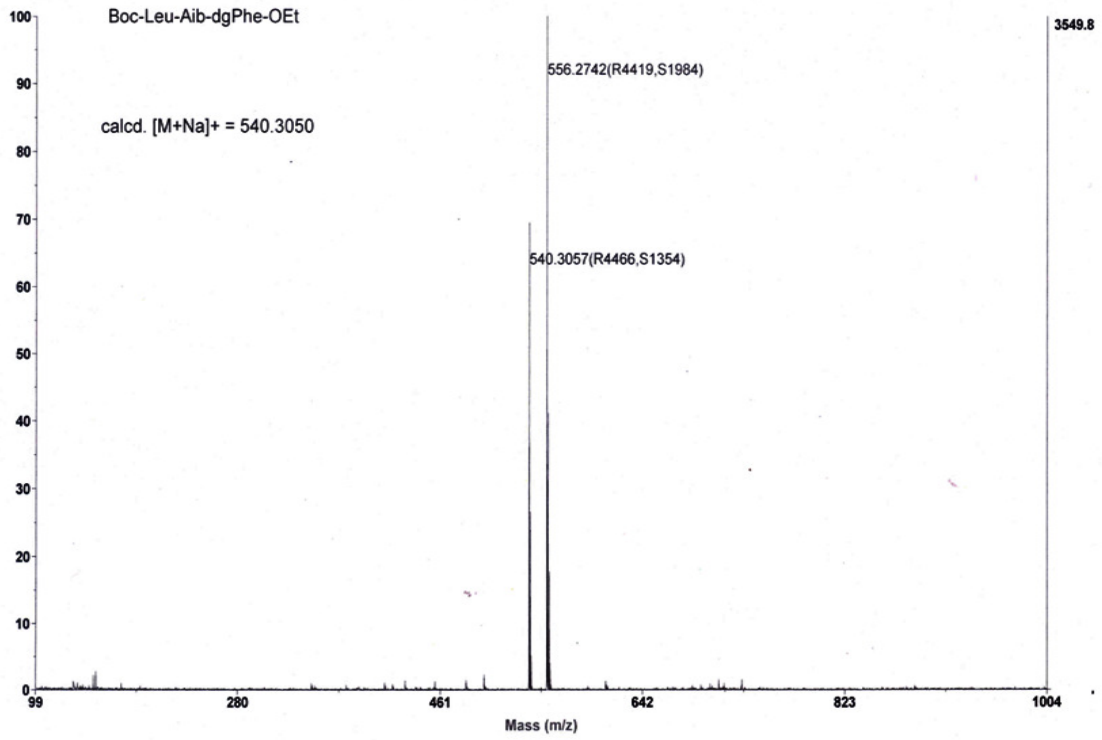

Boc-LUdyA-OEt

20150206-MGK-LUdyA  
MGK-LUdyA

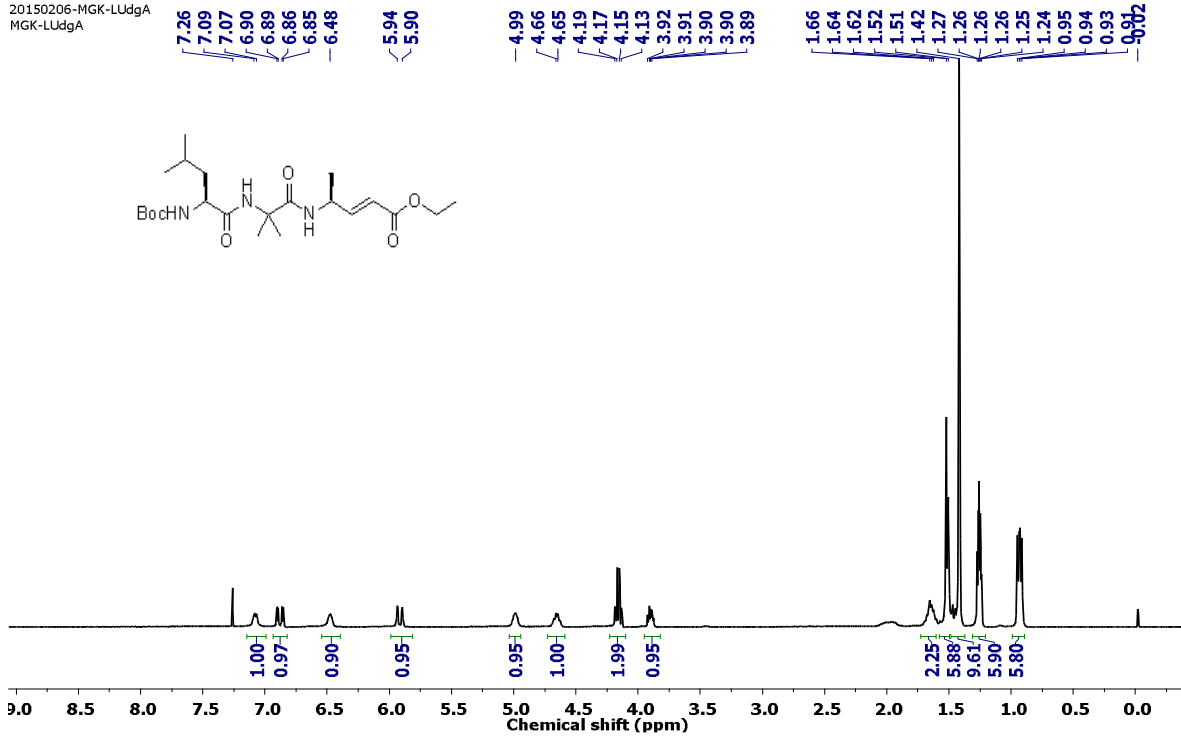

20150206-MGK-LUdgA  
MGK-LUdgA

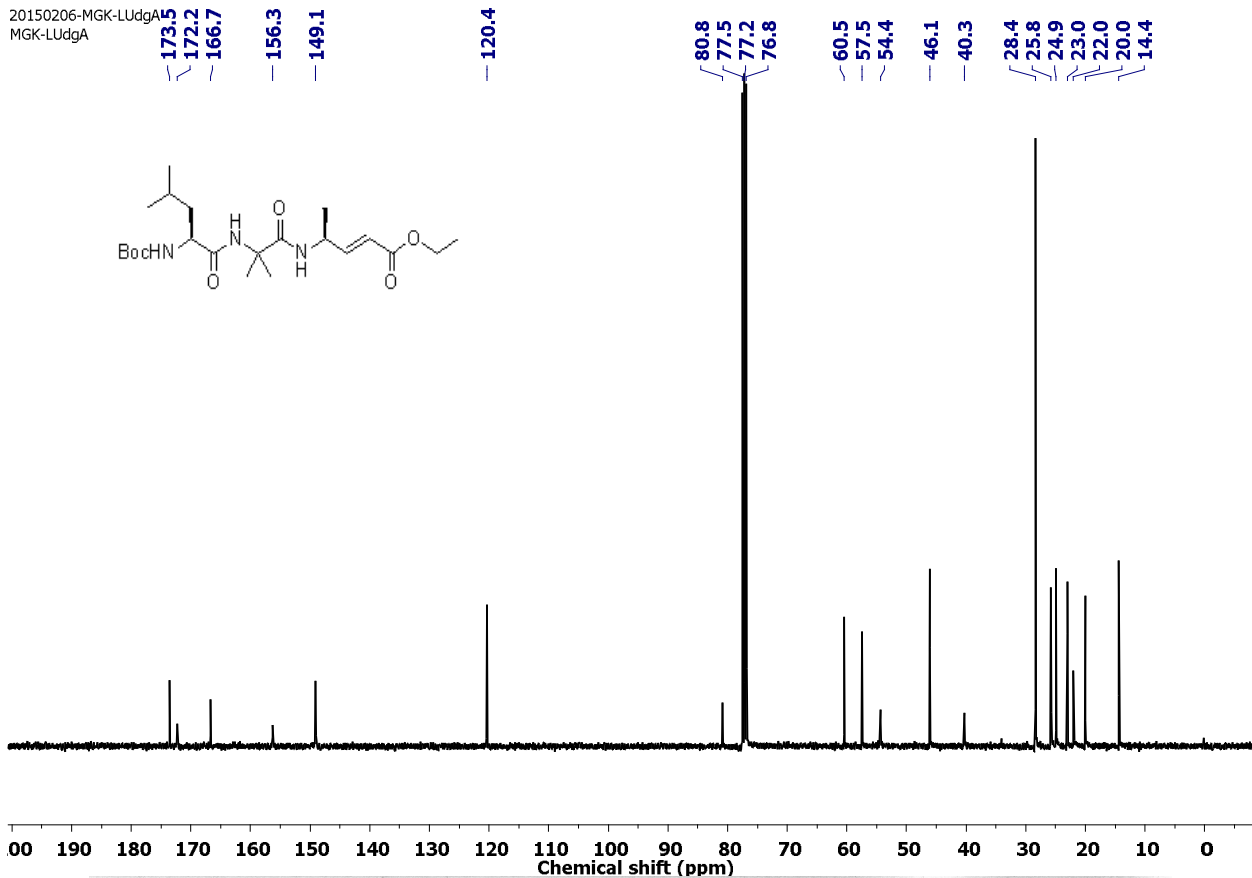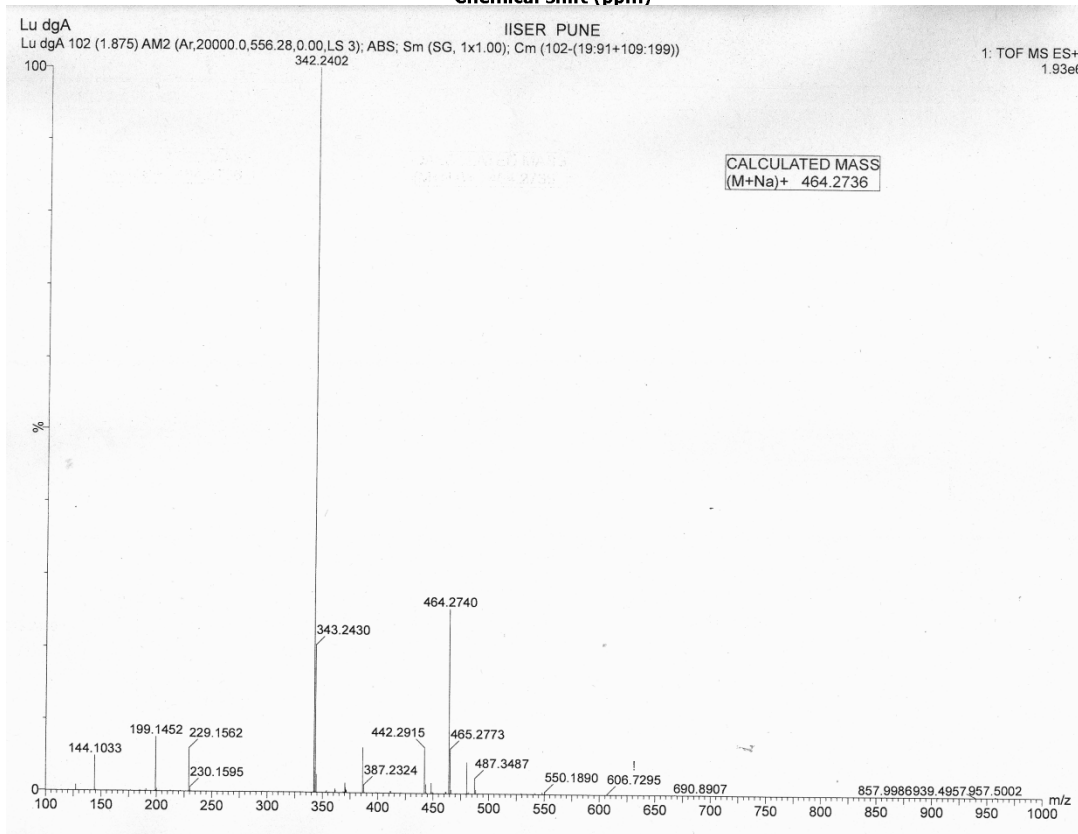

# Peptide P1

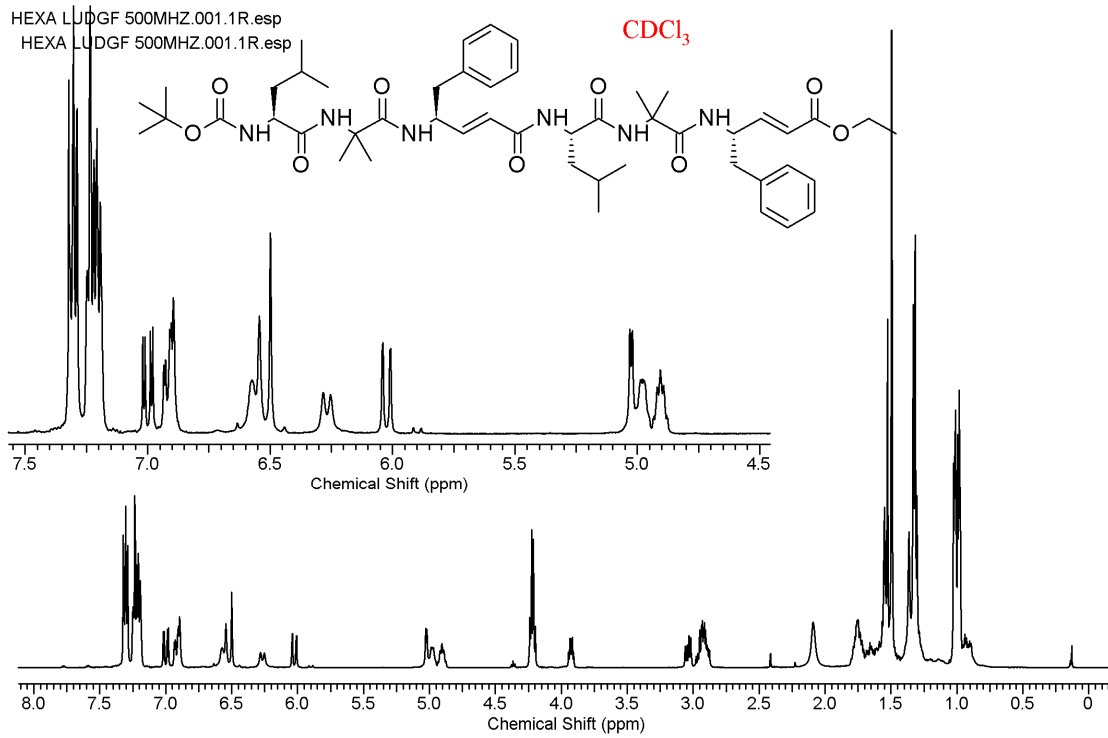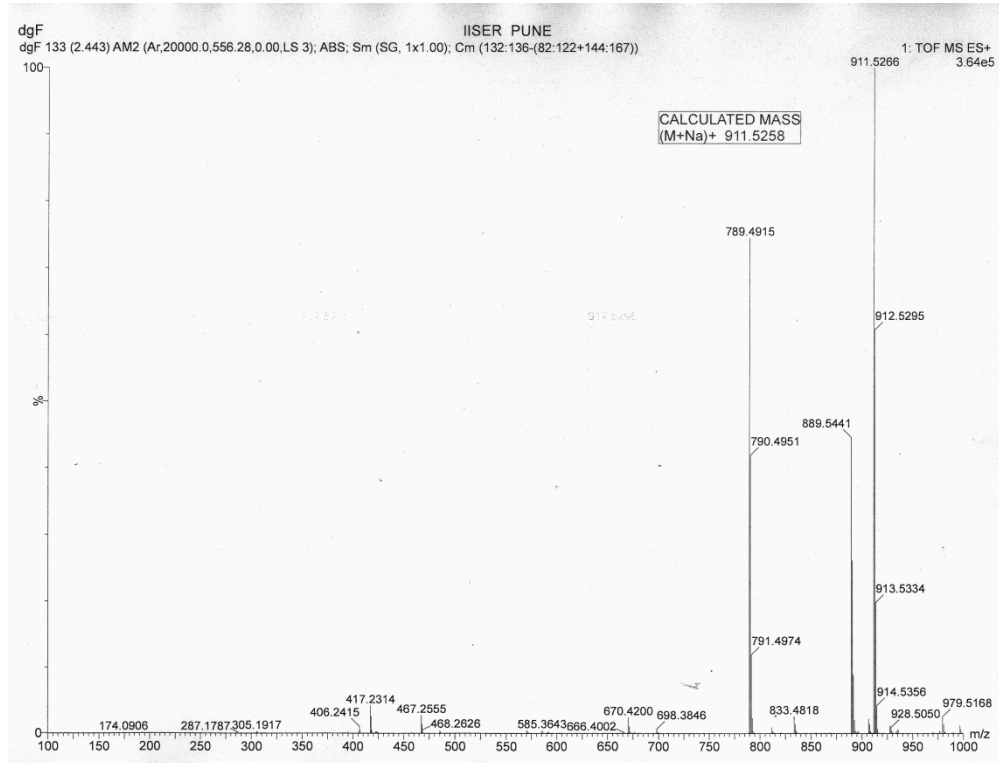



# Peptide P2

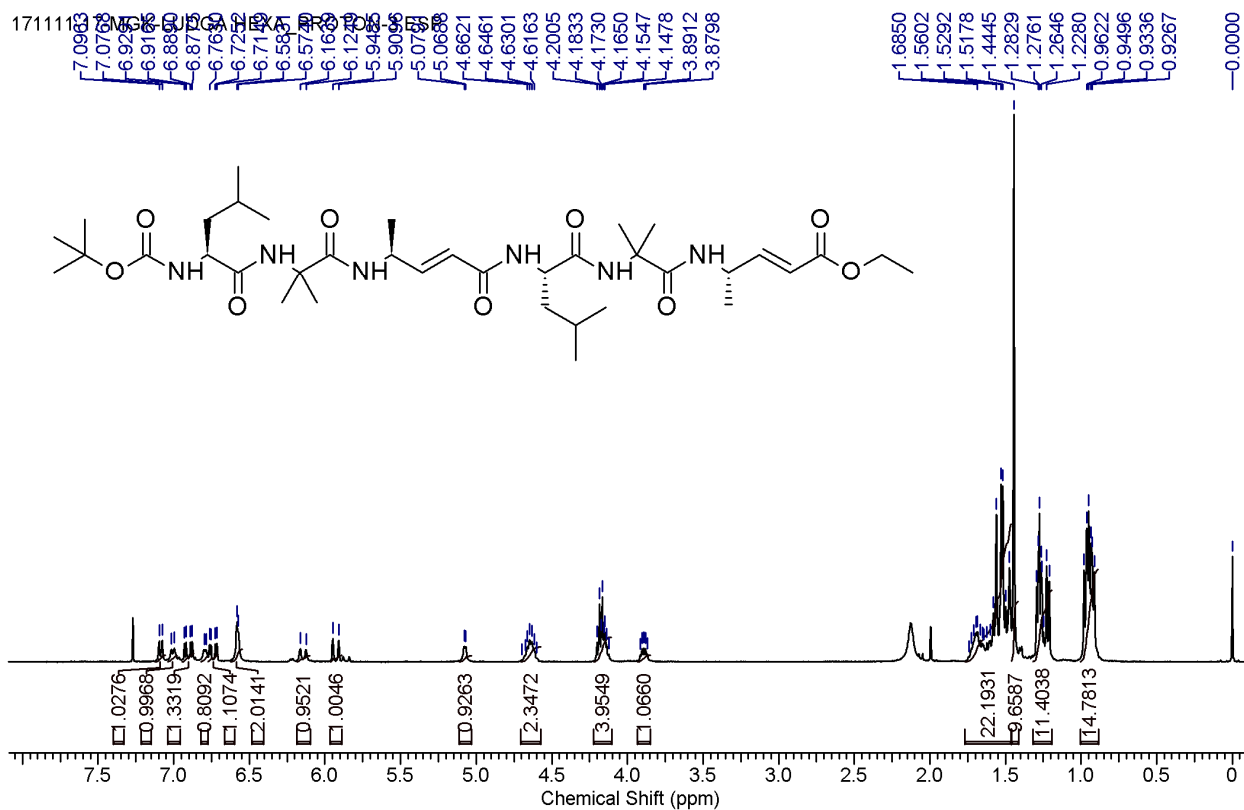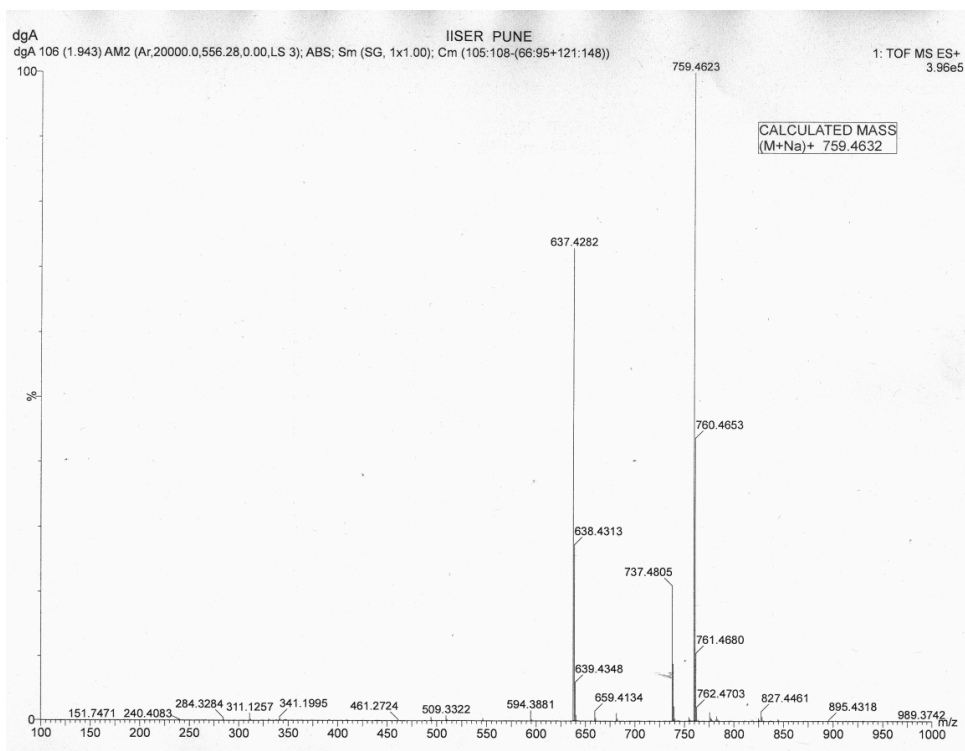

# Peptide P3

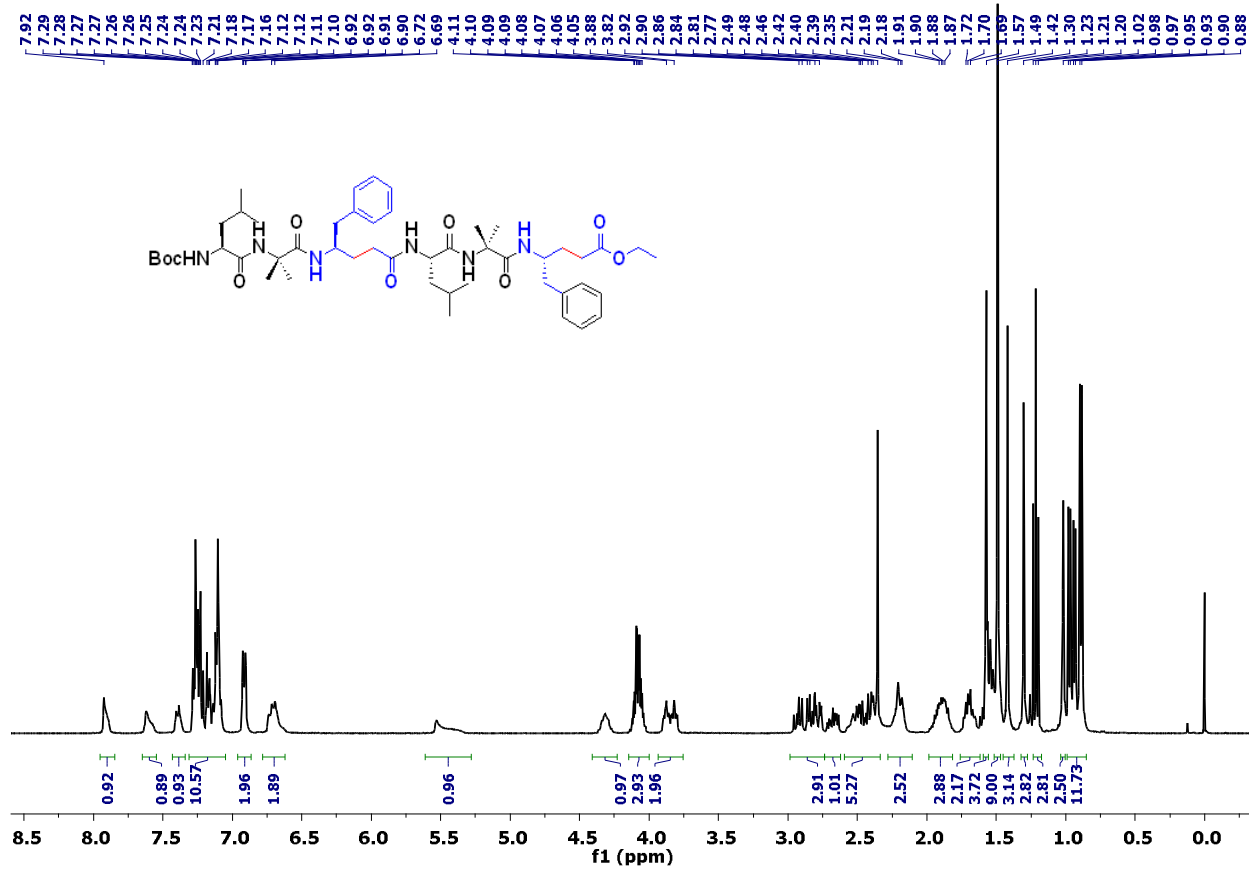

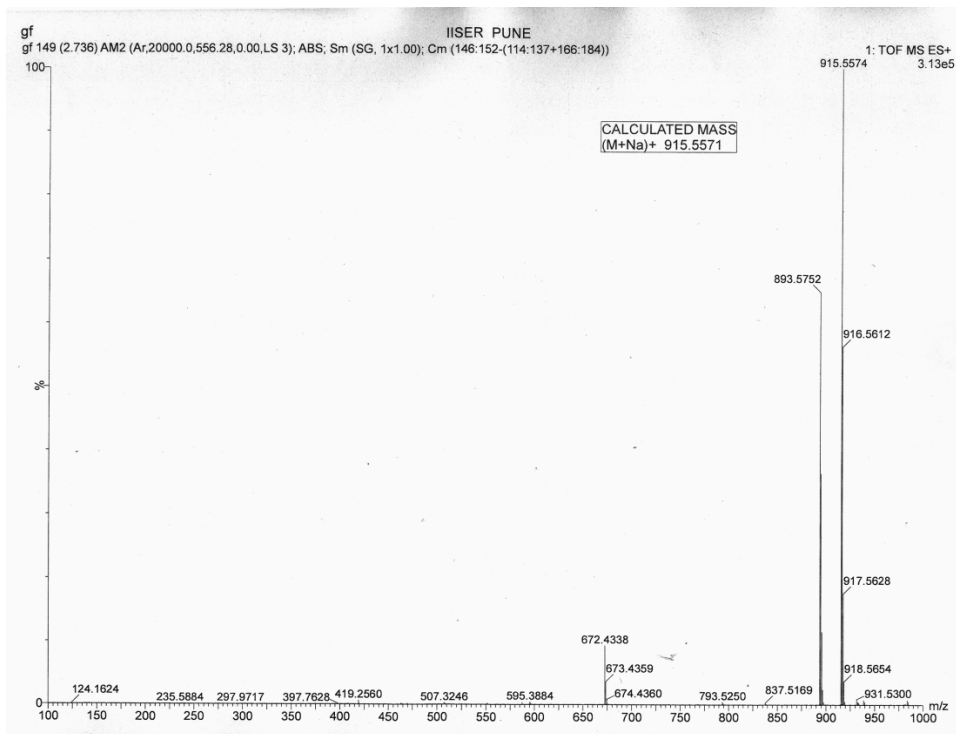

### Peptide P4

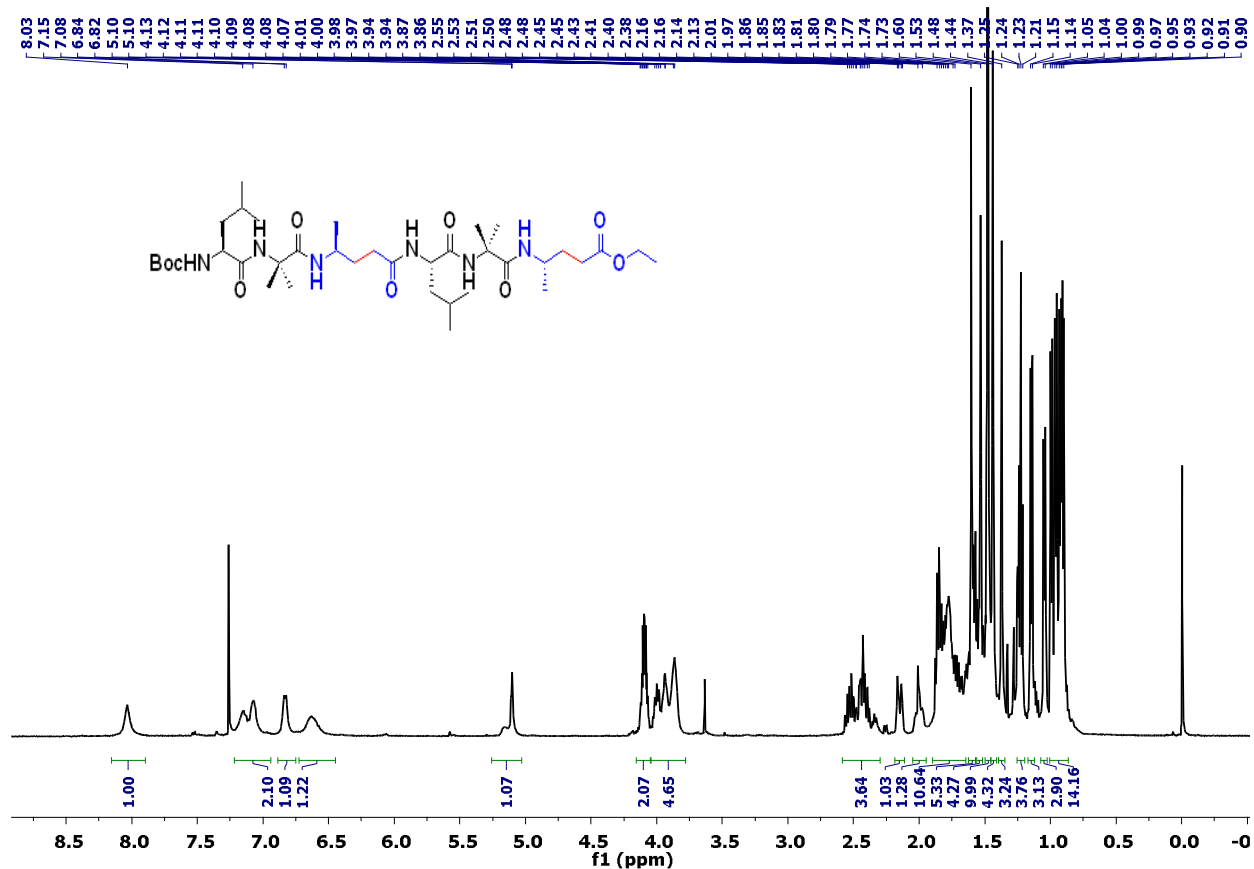

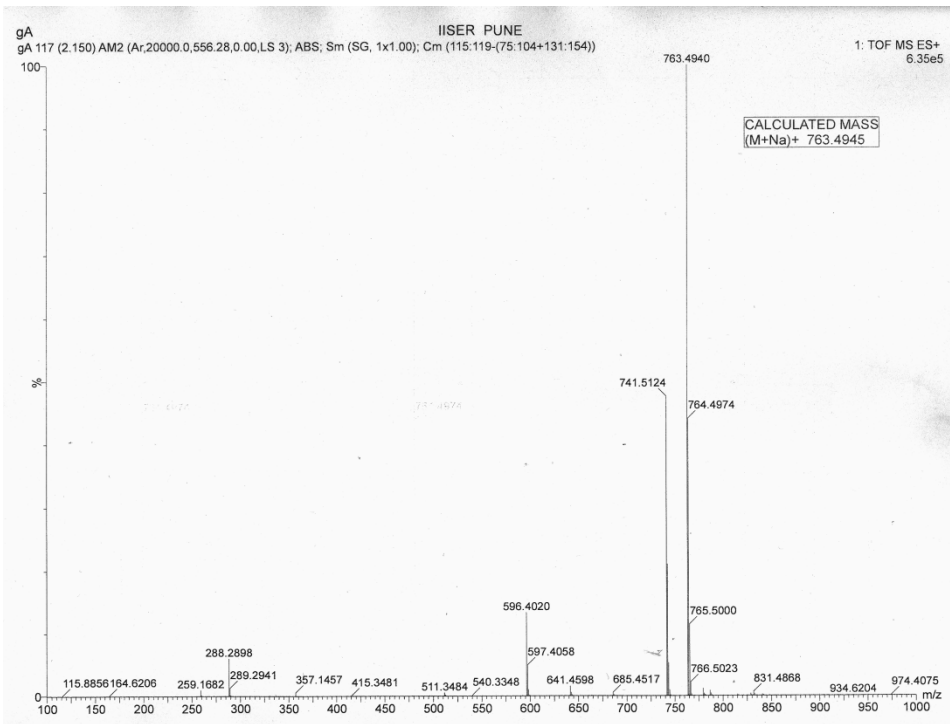

Supplement: c5cc04523a1.pdf [file c5cc04523a1.pdf]
